# Supplementary material for: Iodine-catalyzed diamination of styrene in water with the oxidation of H2O2
Source: Royal Society of Chemistry journal article supplement (doi:10.1039/c8gc01332b), 2018-01-01

# Supporting Information

## Iodine catalyzed diamination of styrene in water with the oxidation of H<sub>2</sub>O<sub>2</sub>

Liyan Liu,<sup>‡</sup> Qi Sun,<sup>‡</sup> Zicong Yan, Xiping Liang, Zhenggen Zha, Yu Yang\* and Zhiyong Wang\*

Hefei National Laboratory for Physical Sciences at Microscale, CAS Key Laboratory of Soft Matter Chemistry & Center for Excellence in Molecular Synthesis of Chinese Academy of Sciences, Collaborative Innovation Center of Suzhou Nano Science and Technology & School of Chemistry and Materials Science, University of Science and Technology of China, Hefei, 230026, Anhui, Hefei, P. R. China.

E-mail: zwang3@ustc.edu.cn.

### Table of Contents

|                                           |     |
|-------------------------------------------|-----|
| 1. General Information                    | S2  |
| 2. General Procedures for Diamination     | S2  |
| 3. Characterization Data for the Products | S2  |
| 4. Mechanistic Studies                    | S10 |
| 4.1. Radical Trapping Experiments         | S10 |
| 4.2 Effect of <i>N</i> -Substituents      | S10 |
| 4.3 kinetics Isotope Effect (KIE)         | S10 |
| 5. References                             | S11 |
| 6. NMR spectra of product                 | S12 |

## 1. General Information

Unless otherwise indicated, all commercial reagents were used without additional purification. All Substances were synthesized according to the previous literature.<sup>1</sup> <sup>1</sup>H NMR and <sup>13</sup>C NMR were recorded on a Bruker-400 MHz Spectrometer (<sup>1</sup>H NMR: 400 MHz, <sup>13</sup>C NMR: 100 MHz). All chemical shifts ( $\delta$ ) were reported in ppm and coupling constants ( $J$ ) in Hz. All chemical shifts were reported relative to tetramethylsilane (0 ppm for <sup>1</sup>H), and CDCl<sub>3</sub> (77 ppm for <sup>13</sup>C), respectively. HRMS (ESI) were recorded on a Water™ Q-TOF Premier Mass Spectrometer.

## 2. General Procedure for Diamination

To a 5 mL tube was added 2-aminostyreen **1** (0.2 mmol), aniline **2** (0.3 mmol, 1.5 equiv), H<sub>2</sub>O<sub>2</sub> (0.6 mmol, 30% in water), TMDAI (20% mol) and water (1 mL). The mixture was stirred at 45 °C for 12 hours, and extracted with DCM (1 mL  $\times$  3). The combined organic phase was washed with brine and dried over anhydrous Na<sub>2</sub>SO<sub>4</sub>. After the solvent had been completely removed, the residue was purified by column chromatography on silica gel to give the product **3**.

## 3. Characterization Data for the Products

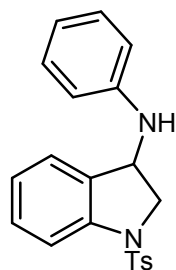

### *N*-phenyl-1-tosylindolin-3-amine (**3a**)

White solid. m.p. 135-136 °C. <sup>1</sup>H NMR (400 MHz, Chloroform-*d*)  $\delta$  7.74 (d,  $J$  = 8.2 Hz, 1H), 7.59 (d,  $J$  = 8.0 Hz, 2H), 7.34 (t,  $J$  = 7.7 Hz, 1H), 7.25 (d,  $J$  = 7.3 Hz, 1H), 7.21 - 7.13 (m, 4H), 7.06 (t,  $J$  = 7.5 Hz, 1H), 6.76 (t,  $J$  = 7.3 Hz, 1H), 6.42 (d,  $J$  = 7.9 Hz, 2H), 4.85 (dd,  $J$  = 7.4, 3.5 Hz, 1H), 4.10 (dd,  $J$  = 11.6, 7.3 Hz, 1H), 3.83 (dd,  $J$  = 11.7, 3.5 Hz, 1H), 3.32 (s, 1H), 2.38 (s, 3H). <sup>13</sup>C NMR (100 MHz, CDCl<sub>3</sub>)  $\delta$  145.5, 144.1, 142.0, 133.6, 132.2, 129.9, 129.7, 129.3, 127.2, 125.5, 124.3, 118.4, 115.8, 113.1, 56.6, 53.1, 21.5. HRMS (ESI)  $m/z$  calcd for C<sub>21</sub>H<sub>20</sub>N<sub>2</sub>NaO<sub>2</sub>S [M+Na]<sup>+</sup> 387.1143, found 387.1140.

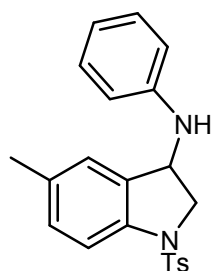

### 5-methyl-*N*-phenyl-1-tosylindolin-3-amine (**3b**)

Red solid. m.p. 141 - 143 °C. <sup>1</sup>H NMR (400 MHz, Chloroform-*d*)  $\delta$  7.62 (d,  $J$  = 8.3 Hz, 1H), 7.59 - 7.54 (m, 2H), 7.21 - 7.12 (m, 5H), 7.05 (s, 1H), 6.79 - 6.70 (m, 1H), 6.47 - 6.35 (m, 2H), 4.78 (dd,  $J$  = 7.3, 3.4 Hz, 1H), 4.09 (dd,  $J$  = 11.8, 7.2 Hz, 1H), 3.80 (dd,  $J$  = 11.8, 3.5 Hz, 1H), 3.19 (s, 1H), 2.38 (s,

3H), 2.29 (s, 3H).  $^{13}\text{C}$  NMR (100 MHz,  $\text{CDCl}_3$ )  $\delta$  145.6, 144.0, 139.7, 134.2, 133.6, 132.5, 130.5, 129.6, 129.3, 127.3, 125.9, 118.3, 115.9, 113.1, 56.8, 53.2, 21.5, 20.9. HRMS (ESI)  $m/z$  calcd for  $\text{C}_{22}\text{H}_{22}\text{N}_2\text{NaO}_2\text{S}$   $[\text{M}+\text{Na}]^+$  401.1300, found 401.1297.

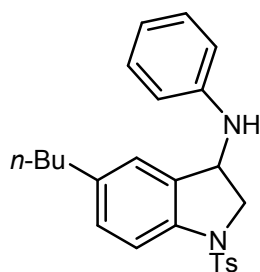

**5-butyl-*N*-phenyl-1-tosylindolin-3-amine (3c)**

Yellow oil.  $^1\text{H}$  NMR (400 MHz, Chloroform-*d*)  $\delta$  7.63 (d,  $J$  = 8.3 Hz, 1H), 7.58 (d,  $J$  = 8.0 Hz, 2H), 7.21 - 7.12 (m, 5H), 7.06 (s, 1H), 6.75 (t,  $J$  = 7.4 Hz, 1H), 6.41 (d,  $J$  = 7.9 Hz, 2H), 4.79 (s, 1H), 4.10 (dd,  $J$  = 11.7, 7.2 Hz, 1H), 3.80 (dd,  $J$  = 11.7, 3.4 Hz, 1H), 3.21 (s, 1H), 2.55 (t,  $J$  = 7.8 Hz, 2H), 2.38 (s, 3H), 1.50 - 1.58 (m, 2H), 1.29 - 1.35 (m, 2H), 0.91 (t,  $J$  = 7.3 Hz, 3H).  $^{13}\text{C}$  NMR (100 MHz,  $\text{CDCl}_3$ )  $\delta$  145.7, 144.0, 139.8, 139.4, 133.7, 132.3, 129.9, 129.6, 129.3, 127.3, 125.2, 118.3, 115.8, 113.1, 56.8, 53.2, 35.0, 33.6, 22.2, 21.5, 13.9. HRMS (ESI)  $m/z$  calcd for  $\text{C}_{25}\text{H}_{28}\text{N}_2\text{NaO}_2\text{S}$   $[\text{M}+\text{Na}]^+$  443.1769, found 443.1767.

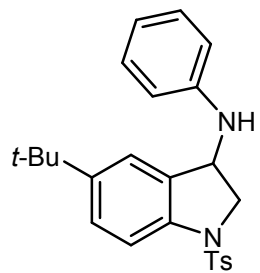

**5-(tert-butyl)-*N*-phenyl-1-tosylindolin-3-amine (3d)**

Gray oil. m.p. 136 - 137 °C.  $^1\text{H}$  NMR (400 MHz, Chloroform-*d*)  $\delta$  7.66 - 7.58 (m, 3H), 7.36 (dd,  $J$  = 8.5, 2.1 Hz, 1H), 7.28 (d,  $J$  = 2.1 Hz, 1H), 7.22 - 7.14 (m, 4H), 6.79 - 6.73 (m, 1H), 6.49 - 6.41 (m, 2H), 4.84 (dd,  $J$  = 7.2, 3.5 Hz, 1H), 4.09 (dd,  $J$  = 11.5, 7.2 Hz, 1H), 3.80 (dd,  $J$  = 11.5, 3.5 Hz, 1H), 3.32 (s, 1H), 2.39 (s, 3H), 1.28 (s, 9H).  $^{13}\text{C}$  NMR (100 MHz,  $\text{CDCl}_3$ )  $\delta$  147.6, 145.7, 144.0, 139.5, 133.8, 131.8, 129.7, 129.3, 127.3, 127.0, 122.2, 118.3, 115.2, 113.2, 56.8, 53.4, 34.5, 31.4, 21.5. HRMS (ESI)  $m/z$  calcd for  $\text{C}_{25}\text{H}_{28}\text{N}_2\text{NaO}_2\text{S}$   $[\text{M}+\text{Na}]^+$  443.1769, found 443.1770.

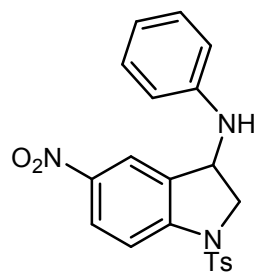

**5-nitro-*N*-phenyl-1-tosylindolin-3-amine (3e)**

Yellow solid. m.p. 148 - 150 °C.  $^1\text{H}$  NMR (400 MHz, Chloroform-*d*)  $\delta$  8.21 (dd,  $J$  = 9.0, 2.4 Hz, 1H), 8.13 (d,  $J$  = 2.3 Hz, 1H), 7.78 (d,  $J$  = 9.0 Hz, 1H), 7.71 - 7.64 (m, 2H), 7.28 (d,  $J$  = 8.1 Hz, 2H), 7.23 - 7.15 (m, 2H), 6.80 (t,  $J$  = 7.4 Hz, 1H), 6.53 - 6.47 (m, 2H), 5.03 (dd,  $J$  = 7.9, 4.2 Hz, 1H), 4.25 (dd,  $J$  = 11.3, 7.8 Hz, 1H), 3.90 (dd,  $J$  = 11.3, 4.3 Hz, 1H), 3.61 (s, 1H), 2.41 (s, 3H).  $^{13}\text{C}$  NMR (100 MHz,  $\text{CDCl}_3$ )  $\delta$  147.4, 145.2, 145.0, 143.9, 133.3, 133.0, 130.1, 129.5, 127.1,

126.4, 121.7, 119.1, 114.2, 113.3, 57.2, 52.3, 21.6. HRMS (ESI)  $m/z$  calcd for  $C_{21}H_{20}N_3O_4S$   $[M+H]^+$  410.1175, found 410.1175.

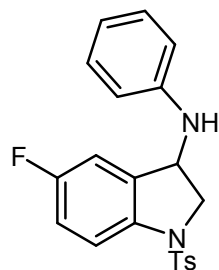

**5-fluoro-*N*-phenyl-1-tosylindolin-3-amine (3f)**

Red solid. m.p. 133 °C.  $^1H$  NMR (400 MHz, Chloroform-*d*)  $\delta$  7.69 (dd,  $J$  = 8.9, 4.5 Hz, 1H), 7.59 - 7.53 (m, 2H), 7.21 (d,  $J$  = 8.1 Hz, 2H), 7.19 - 7.14 (m, 2H), 7.04 (td,  $J$  = 8.8, 2.7 Hz, 1H), 6.97 - 6.91 (m, 1H), 6.77 (tt,  $J$  = 7.3, 1.1 Hz, 1H), 6.43 - 6.35 (m, 2H), 4.80 (dd,  $J$  = 7.6, 3.7 Hz, 1H), 4.15 (dd,  $J$  = 12.0, 7.4 Hz, 1H), 3.83 (dd,  $J$  = 11.9, 3.7 Hz, 1H), 3.15 (br, 1H), 2.41 (s, 3H).  $^{13}C$  NMR (100 MHz,  $CDCl_3$ )  $\delta$  159.8 (d,  $J$  = 244.0 Hz), 145.3, 144.3, 138.0 (d,  $J$  = 2.2 Hz), 134.4 (d,  $J$  = 7.9 Hz), 133.4, 129.8, 129.4, 127.3, 118.7, 117.4 (d,  $J$  = 8.3 Hz), 116.7 (d,  $J$  = 23.7 Hz), 113.2, 112.5 (d,  $J$  = 24.1 Hz), 57.0, 53.1 (d,  $J$  = 1.8 Hz), 21.5.  $^{19}F$  NMR (376 MHz,  $CDCl_3$ )  $\delta$  -117.7. HRMS (ESI)  $m/z$  calcd for  $C_{21}H_{19}FN_2NaO_2S$   $[M+Na]^+$  405.1049, found 405.1045.

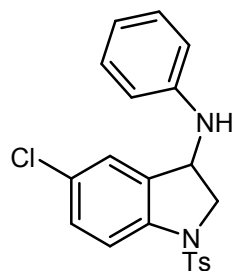

**5-chloro-*N*-phenyl-1-tosylindolin-3-amine (3g)**

Gray solid. m.p. 154 - 155 °C.  $^1H$  NMR (400 MHz, Chloroform-*d*)  $\delta$  7.65 (d,  $J$  = 8.7 Hz, 1H), 7.60 - 7.55 (m, 2H), 7.29 (dd,  $J$  = 8.7, 2.2 Hz, 1H), 7.24 - 7.20 (m, 3H), 7.19 - 7.14 (m, 2H), 6.75 - 6.79 (m, 1H), 6.44 - 6.37 (m, 2H), 4.82 (dd,  $J$  = 7.5, 3.8 Hz, 1H), 4.12 (dd,  $J$  = 11.7, 7.5 Hz, 1H), 3.81 (dd,  $J$  = 11.7, 3.8 Hz, 1H), 3.25 (s, 1H), 2.40 (s, 3H).  $^{13}C$  NMR (100 MHz,  $CDCl_3$ )  $\delta$  145.3, 144.4, 140.7, 134.1, 133.3, 129.9, 129.8, 129.4, 129.4, 127.2, 125.6, 118.6, 116.9, 113.2, 56.8, 52.9, 21.5. HRMS (ESI)  $m/z$  calcd for  $C_{21}H_{20}ClN_2O_2S$   $[M+H]^+$  399.0934, found 399.0925.

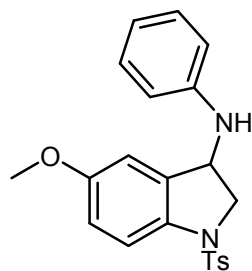

**5-methoxy-*N*-phenyl-1-tosylindolin-3-amine (3h)**

Red oil.  $^1H$  NMR (400 MHz, Chloroform-*d*)  $\delta$  7.66 (d,  $J$  = 8.9 Hz, 1H), 7.54 (d,  $J$  = 8.3 Hz, 2H), 7.20 - 7.14 (m, 4H), 6.89 (dd,  $J$  = 8.8, 2.7 Hz, 1H), 6.78 (d,  $J$  = 3.0 Hz, 1H), 6.74 (d,  $J$  = 7.4, 1H), 6.70 - 6.66 (m, 1H), 6.40 - 6.33 (m, 2H), 4.74 (dd,  $J$  = 7.2, 3.5 Hz, 1H), 4.11 (dd,  $J$  = 12.1, 7.2 Hz, 1H), 3.80 (dd,  $J$  = 12.1, 3.5 Hz, 1H), 3.75 (s, 3H), 3.09 (s, 1H), 2.40 (s, 3H).  $^{13}C$  NMR (100 MHz,  $CDCl_3$ )  $\delta$  145.5, 144.0, 135.3, 134.1, 133.5, 129.7, 129.3, 127.3, 118.4, 117.6, 115.6, 115.1,

113.1, 110.4, 57.0, 55.6, 53.5, 21.5. HRMS (ESI)  $m/z$  calcd for  $C_{22}H_{22}N_2Na O_3S [M+Na]^+$   
417.1249, found 417.1248.

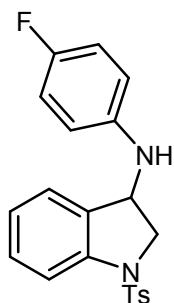

***N*-(4-fluorophenyl)-1-tosylindolin-3-amine (3i)**

Red solid. m.p. 125 °C.  $^1H$  NMR (400 MHz, Chloroform-*d*)  $\delta$  7.73 (d,  $J$  = 8.1 Hz, 1H), 7.60 (d,  $J$  = 8.3 Hz, 2H), 7.32 – 7.36 (m, 1H), 7.26 - 7.23 (m, 1H), 7.20 (d,  $J$  = 8.0 Hz, 2H), 7.06 (td,  $J$  = 7.5, 1.0 Hz, 1H), 6.88 (dd,  $J$  = 9.7, 7.7 Hz, 2H), 6.39 - 6.31 (m, 2H), 4.79 (dd,  $J$  = 7.3, 3.4 Hz, 1H), 4.07 (dd,  $J$  = 11.7, 7.3 Hz, 1H), 3.81 (dd,  $J$  = 11.6, 3.4 Hz, 1H), 3.19 (br, 1H), 2.38 (s, 3H).  $^{13}C$  NMR (100 MHz,  $CDCl_3$ )  $\delta$  156.1 (d,  $J$  = 235.1 Hz), 144.2, 141.9, 141.9, 133.6, 132.0, 129.9, 129.7, 127.2, 125.5, 124.3, 115.9 (d,  $J$  = 22.3 Hz), 115.8, 114.1 (d,  $J$  = 7.3 Hz), 56.3, 53.7, 21.5.  $^{19}F$  NMR (376 MHz,  $CDCl_3$ )  $\delta$  -126.5. HRMS (ESI)  $m/z$  calcd for  $C_{21}H_{20}FN_2O_2S [M+H]^+$  383.1230, found 383.1230.

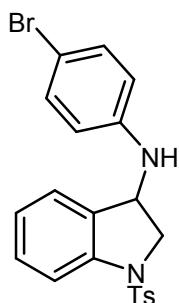

***N*-(4-bromophenyl)-1-tosylindolin-3-amine (3j)**

Red solid. m.p. 144 - 146 °C.  $^1H$  NMR (400 MHz, Chloroform-*d*)  $\delta$  7.73 (dd,  $J$  = 8.2, 2.1 Hz, 1H), 7.59 (dd,  $J$  = 8.4, 2.3 Hz, 2H), 7.35 (t,  $J$  = 7.9 Hz, 1H), 7.27 – 7.16 (m, 5H), 7.06 (td,  $J$  = 7.6, 2.1 Hz, 1H), 6.32 – 6.23 (m, 2H), 4.79 (s, 1H), 4.04 – 4.09 (m, 1H), 3.78 - 3.82 (m, 1H), 3.32 (s, 1H), 2.38 (d,  $J$  = 2.1 Hz, 3H).  $^{13}C$  NMR (100 MHz,  $CDCl_3$ )  $\delta$  144.6, 144.2, 141.9, 133.6, 132.0, 131.8, 130.0, 129.7, 127.2, 125.5, 124.4, 115.8, 114.6, 109.9, 56.2, 53.1, 21.5. HRMS (ESI)  $m/z$  calcd for  $C_{21}H_{19}BrN_2O_2SNa [M+Na]^+$  465.0248, found 465.0211.

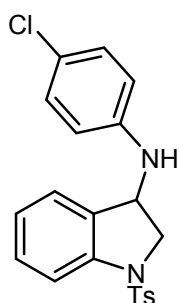

***N*-(4-chlorophenyl)-1-tosylindolin-3-amine (3k)**

Red solid. 133 - 134 °C.  $^1H$  NMR (400 MHz, Chloroform-*d*)  $\delta$  7.73 (d,  $J$  = 8.1 Hz, 1H), 7.59 (d,  $J$  = 7.9 Hz, 2H), 7.34 (t,  $J$  = 7.8 Hz, 1H), 7.24 (d,  $J$  = 7.3 Hz, 1H), 7.20 (d,  $J$  = 8.0 Hz, 2H), 7.13 - 6.96 (m, 3H), 6.33 (d,  $J$  = 8.4 Hz, 2H), 4.79 (dd,  $J$  = 7.4, 3.3 Hz, 1H), 4.06 (dd,  $J$  = 11.7, 7.3 Hz, 1H), 3.80 (dd,  $J$  = 11.6, 3.4 Hz, 1H), 3.31 (s, 1H), 2.38 (s, 3H).  $^{13}C$  NMR (100 MHz,  $CDCl_3$ )  $\delta$  144.2, 144.1, 142.0, 133.6, 131.8, 130.0, 129.7, 129.2, 127.2, 125.5, 124.4, 122.9, 115.9, 114.2, 56.2, 53.2, 21.5.

HRMS (ESI)  $m/z$  calcd for  $C_{21}H_{20}ClN_2O_2S$   $[M+H]^+$  399.0934, found 399.0922.

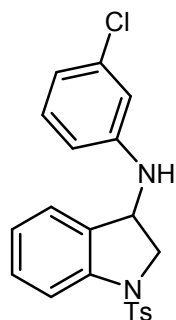

***N*-(3-chlorophenyl)-1-tosylindolin-3-amine (3l)**

Yellow solid. m.p. 125 - 127 °C.  $^1H$  NMR (400 MHz, Chloroform-*d*)  $\delta$  7.75 (d,  $J$  = 8.2 Hz, 1H), 7.57 (d,  $J$  = 8.1 Hz, 2H), 7.36 (t,  $J$  = 7.8 Hz, 1H), 7.25 (d,  $J$  = 7.1 Hz, 1H), 7.20 (d,  $J$  = 8.0 Hz, 2H), 7.10 - 7.05 (m, 2H), 6.71 (d,  $J$  = 7.8 Hz, 1H), 6.31 (s, 1H), 6.28 (d,  $J$  = 8.2 Hz, 1H), 4.77 (dd,  $J$  = 7.1, 3.0 Hz, 1H), 4.07 (dd,  $J$  = 11.8, 7.1 Hz, 1H), 3.82 (dd,  $J$  = 11.8, 2.8 Hz, 1H), 3.26 (s, 1H), 2.40 (s, 3H).

$^{13}C$  NMR (100 MHz,  $CDCl_3$ )  $\delta$  146.7, 144.3, 142.0, 135.0, 133.6, 131.8, 130.3, 130.1, 129.8, 127.2, 125.5, 124.5, 118.2, 116.2, 113.1, 111.1, 56.3, 53.0, 21.5. HRMS (ESI)  $m/z$  calcd for  $C_{21}H_{20}ClN_2O_2S$   $[M+H]^+$  399.0934, found 399.0930.

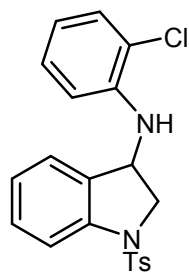

***N*-(2-chlorophenyl)-1-tosylindolin-3-amine (3m)**

Red solid. m.p. 141 - 143 °C.  $^1H$  NMR (400 MHz, Chloroform-*d*)  $\delta$  7.75 (d,  $J$  = 8.1 Hz, 1H), 7.61 (d,  $J$  = 8.1 Hz, 2H), 7.39 - 7.33 (m, 1H), 7.27 - 7.23 (m, 2H), 7.18 - 7.12 (m, 3H), 7.08 (t,  $J$  = 7.5 Hz, 1H), 6.69 (t,  $J$  = 7.7 Hz, 1H), 6.59 (d,  $J$  = 8.2 Hz, 1H), 4.88 (td,  $J$  = 7.3, 3.8 Hz, 1H), 4.19 (dd,  $J$  = 11.5, 7.5 Hz, 1H),

4.05 (d,  $J$  = 7.4 Hz, 1H), 3.82 (dd,  $J$  = 11.6, 3.9 Hz, 1H), 2.35 (s, 3H).  $^{13}C$  NMR (101 MHz,  $CDCl_3$ )  $\delta$  144.5, 142.1, 141.8, 133.6, 131.6, 130.2, 129.8, 129.6, 127.9, 127.2, 125.5, 124.5, 119.5, 118.4, 115.7, 111.4, 56.8, 53.1, 21.7. HRMS (ESI)  $m/z$  calcd for  $C_{21}H_{19}ClN_2O_2SNa$   $[M+Na]^+$  421.0753, found 421.0739.

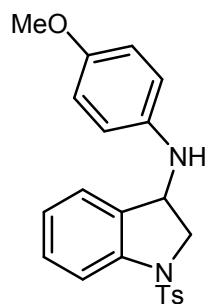

***N*-(4-methoxyphenyl)-1-tosylindolin-3-amine (3n)**

Red oil.  $^1H$  NMR (400 MHz, Chloroform-*d*)  $\delta$  7.73 (d,  $J$  = 8.1 Hz, 1H), 7.63 - 7.57 (m, 2H), 7.34 - 7.30 (m, 1H), 7.23 (s, 1H), 7.20 (d,  $J$  = 7.9 Hz, 2H), 7.04 (td,  $J$  = 7.5, 1.0 Hz, 1H), 6.79 - 6.73 (m, 2H), 6.43 - 6.35 (m, 2H), 4.79 (dd,  $J$  = 7.4, 3.5 Hz, 1H), 4.07 (dd,  $J$  = 11.6, 7.4 Hz, 1H), 3.81 (dd,  $J$  = 11.6, 3.5 Hz, 1H), 3.75 (s, 3H), 3.03 (br, 1H), 2.38 (s, 3H).  $^{13}C$  NMR (100 MHz,  $CDCl_3$ )  $\delta$

152.6, 144.1, 141.8, 139.6, 133.6, 132.4, 129.7, 129.6, 127.2, 125.5, 124.2, 115.7, 114.8, 114.7, 56.4, 55.6, 54.0, 21.5. HRMS (ESI)  $m/z$  calcd for  $C_{22}H_{23}N_2O_3S$   $[M+H]^+$  395.1429, found

395.1423.

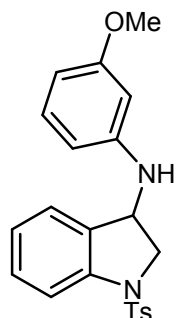

***N*-(3-methoxyphenyl)-1-tosylindolin-3-amine (3o)**

Red oil. <sup>1</sup>H NMR (400 MHz, Chloroform-*d*) δ 7.73 (d, *J* = 8.1 Hz, 1H), 7.62 - 7.57 (m, 2H), 7.37 - 7.28 (m, 1H), 7.26 - 7.24 (m, 1H), 7.19 (d, *J* = 8.4 Hz, 2H), 7.12 - 7.01 (m, 2H), 6.32 (dd, *J* = 8.2, 1.6 Hz, 1H), 6.03 (dd, *J* = 8.1, 1.5 Hz, 1H), 5.98 - 5.99 (m, 1H), 4.82 (dd, *J* = 7.4, 3.4 Hz, 1H), 4.08 (dd, *J* = 11.7, 7.3 Hz, 1H), 3.83 (dd, *J* = 11.7, 3.5 Hz, 1H), 3.75 (s, 3H), 3.31 (s, 1H), 2.38 (s, 3H). <sup>13</sup>C NMR (100 MHz, CDCl<sub>3</sub>) δ 160.7, 147.0, 144.1, 141.9, 133.6, 132.1, 130.1, 129.9, 129.7, 127.2, 125.5, 124.3, 115.8, 106.1, 103.1, 99.4, 56.6, 55.0, 53.1, 21.5. HRMS (ESI) *m/z* calcd for C<sub>22</sub>H<sub>22</sub>N<sub>2</sub>NaO<sub>3</sub>S [M+Na]<sup>+</sup> 417.1249, found 417.1251.

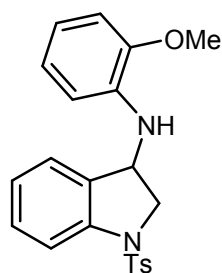

***N*-(2-methoxyphenyl)-1-tosylindolin-3-amine (3p)**

Red oil. <sup>1</sup>H NMR (400 MHz, Chloroform-*d*) δ 7.72 (d, *J* = 8.1 Hz, 1H), 7.65 (d, *J* = 8.3 Hz, 2H), 7.32 (td, *J* = 7.8, 1.3 Hz, 1H), 7.28 (d, *J* = 7.4 Hz, 1H), 7.19 (d, *J* = 8.1 Hz, 2H), 7.04 (td, *J* = 7.5, 1.0 Hz, 1H), 6.85 (td, *J* = 7.4, 1.8 Hz, 1H), 6.78 - 6.75 (m, 1H), 6.75 - 6.70 (m, 1H), 6.54 (dd, *J* = 7.8, 1.5 Hz, 1H), 4.92 (dd, *J* = 7.7, 4.4 Hz, 1H), 4.15 (dd, *J* = 11.1, 7.7 Hz, 1H), 3.83 (s, 1H), 3.80 (dd, *J* = 11.1, 4.4 Hz, 1H), 3.74 (s, 3H), 2.36 (s, 3H). <sup>13</sup>C NMR (100 MHz, CDCl<sub>3</sub>) δ 146.9, 144.1, 141.9, 135.7, 133.6, 132.1, 129.6, 127.2, 125.5, 124.0, 121.1, 117.5, 115.0, 115.0, 110.0, 109.7, 56.8, 55.2, 52.8, 21.5. HRMS (ESI) *m/z* calcd for C<sub>22</sub>H<sub>22</sub>N<sub>2</sub>NaO<sub>3</sub>S [M+Na]<sup>+</sup> 417.1249, found 417.1243.

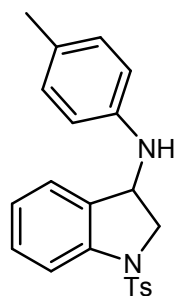

***N*-(p-tolyl)-1-tosylindolin-3-amine (3q)**

Red oil. <sup>1</sup>H NMR (400 MHz, Chloroform-*d*) δ 7.66 (d, *J* = 8.1 Hz, 1H), 7.54 - 7.50 (m, 2H), 7.28 - 7.23 (m, 1H), 7.17 (d, *J* = 7.7 Hz, 1H), 7.12 (d, *J* = 7.6 Hz, 2H), 6.97 (td, *J* = 7.5, 1.0 Hz, 1H), 6.92 - 6.88 (m, 2H), 6.26 (d, *J* = 8.4 Hz, 2H), 4.75 (dd, *J* = 7.5, 3.5 Hz, 1H), 4.02 (dd, *J* = 11.6, 7.4 Hz, 1H), 3.74 (dd, *J* = 11.6, 3.6 Hz, 1H), 3.04 (br, 1H), 2.31 (s, 3H), 2.17 (s, 3H). <sup>13</sup>C NMR (100 MHz, CDCl<sub>3</sub>) δ 144.1, 143.3, 141.9, 133.7, 132.4, 129.9, 129.8, 129.7, 127.6, 127.2, 125.5, 124.3, 115.8, 113.4, 56.6, 53.4, 21.5, 20.3. HRMS (ESI) *m/z* calcd for C<sub>22</sub>H<sub>22</sub>N<sub>2</sub>NaO<sub>2</sub>S [M+Na]<sup>+</sup> 401.1300, found

401.1293.

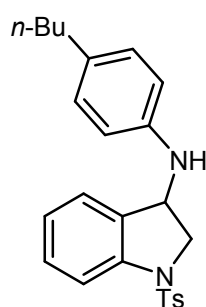

***N*-(4-butylphenyl)-1-tosylindolin-3-amine (3r)**

Red oil. <sup>1</sup>H NMR (400 MHz, Chloroform-*d*) δ 7.73 (d, *J* = 8.1 Hz, 1H), 7.63 - 7.57 (m, 2H), 7.36 - 7.30 (m, 1H), 7.24 (d, *J* = 7.4 Hz, 1H), 7.19 (d, *J* = 8.0 Hz, 2H), 7.05 (td, *J* = 7.5, 1.0 Hz, 1H), 7.02 - 6.96 (m, 2H), 6.40 - 6.32 (m, 2H), 4.83 (dd, *J* = 7.5, 3.6 Hz, 1H), 4.10 (dd, *J* = 11.6, 7.3 Hz, 1H), 3.82 (dd, *J* = 11.6, 3.6 Hz, 1H), 3.16 (s, 1H), 2.51 (t, *J* = 7.7 Hz, 2H), 2.38 (s, 3H), 1.60 - 1.50 (m, 2H), 1.39 - 1.30 (m, 2H), 0.92 (t, *J* = 7.3 Hz, 3H). <sup>13</sup>C NMR (100 MHz, CDCl<sub>3</sub>) δ 144.1, 143.5, 141.9, 133.7, 132.9, 132.4, 129.8, 129.7, 129.2, 127.2, 125.5, 124.3, 115.8, 113.2, 56.7, 53.4, 34.6, 33.9, 22.3, 21.5, 14.0. HRMS (ESI) *m/z* calcd for C<sub>25</sub>H<sub>29</sub>N<sub>2</sub>O<sub>2</sub>S [M+H]<sup>+</sup> 421.1950, found 421.1949.

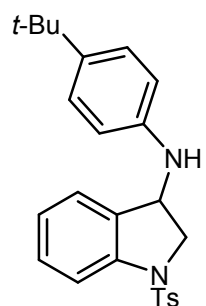

***N*-(4-(tert-butyl)phenyl)-1-tosylindolin-3-amine (3s)**

Red oil. <sup>1</sup>H NMR (400 MHz, Chloroform-*d*) δ 7.73 (d, *J* = 8.1 Hz, 1H), 7.64 - 7.59 (m, 2H), 7.36 - 7.30 (m, 1H), 7.24 (d, *J* = 7.5 Hz, 1H), 7.22 - 7.18 (m, 4H), 7.05 (td, *J* = 7.5, 1.0 Hz, 1H), 6.42 - 6.37 (m, 2H), 4.85 (dd, *J* = 7.7, 3.7 Hz, 1H), 4.12 (dd, *J* = 11.5, 7.4 Hz, 1H), 3.82 (dd, *J* = 11.5, 3.8 Hz, 1H), 3.23 (s, 1H), 2.39 (s, 3H), 1.29 (s, 9H). <sup>13</sup>C NMR (100 MHz, CDCl<sub>3</sub>) δ 144.1, 143.3, 141.9, 141.2, 133.7, 132.4, 129.8, 129.7, 127.3, 126.1, 125.5, 124.2, 115.7, 112.9, 56.8, 53.3, 33.9, 31.5, 21.5. HRMS (ESI) *m/z* calcd for C<sub>25</sub>H<sub>29</sub>N<sub>2</sub>O<sub>2</sub>S [M+H]<sup>+</sup> 421.1950, found 421.1937.

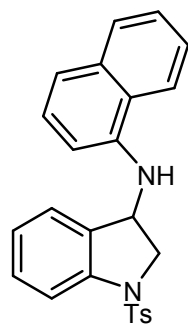

***N*-(naphthalen-1-yl)-1-tosylindolin-3-amine (3t)**

Red solid. m.p. 118 - 119 °C. <sup>1</sup>H NMR (400 MHz, Chloroform-*d*) δ 7.79 (d, *J* = 8.2 Hz, 2H), 7.55 (d, *J* = 7.9 Hz, 2H), 7.47 - 7.41 (m, 1H), 7.39 (t, *J* = 7.9 Hz, 1H), 7.35 - 7.28 (m, 4H), 7.24 (d, *J* = 4.8 Hz, 1H), 7.11 (t, *J* = 7.5 Hz, 1H), 7.01 (d, *J* = 7.9 Hz, 2H), 6.53 (d, *J* = 7.3 Hz, 1H), 4.97 (dd, *J* = 7.2, 2.9 Hz, 1H), 4.25 (dd, *J* = 11.9, 7.2 Hz, 1H), 4.01 (dd, *J* = 12.0, 2.3 Hz, 1H), 3.91 (s, 1H), 2.25 (s, 3H). <sup>13</sup>C NMR (100 MHz, CDCl<sub>3</sub>) δ 143.1, 141.3, 139.8, 133.3, 132.7, 131.2, 129.1, 128.7, 127.7, 126.1, 125.3, 124.9, 124.7, 123.7, 123.5, 122.2, 118.8, 117.6, 115.1, 104.0, 55.6, 52.4, 20.5. HRMS



(ESI)  $m/z$  calcd for  $C_{25}H_{22}N_2NaO_2S$   $[M+Na]^+$  437.1300, found 437.1312.

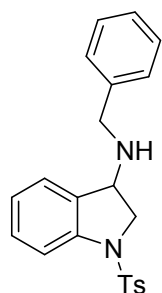

***N*-benzyl-1-tosylindolin-3-amine (3u)**

Colorless oil.  $^1H$  NMR (400 MHz,  $CDCl_3$ )  $\delta$  7.71 (d,  $J = 8.1$  Hz, 1H), 7.65 (d,  $J = 8.3$  Hz, 2H), 7.33 – 7.25 (m, 4H), 7.22 (m, 3H), 7.15 (d,  $J = 8.0$  Hz, 2H), 7.05 (td,  $J = 7.5, 0.8$  Hz, 1H), 4.15 (dd,  $J = 7.6, 3.7$  Hz, 1H), 3.92 (dd,  $J = 11.5, 7.7$  Hz, 1H), 3.82 (dd,  $J = 11.6, 3.8$  Hz, 1H), 3.64 (s, 2H), 2.25 (s, 3H).  $^{13}C$  NMR (100 MHz,  $CDCl_3$ )  $\delta$  144.2, 141.7, 139.4, 133.7, 133.4, 129.6, 129.3, 128.3, 127.9, 127.1, 127.1, 125.4, 123.9, 115.5, 57.3, 55.9, 50.5, 21.4. HRMS (ESI)  $m/z$  calcd for  $C_{22}H_{23}N_2O_2S$   $[M+H]^+$  379.1475, found 379.1478.

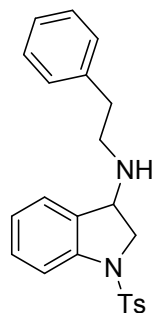

***N*-phenethyl-1-tosylindolin-3-amine (3v)**

Colorless oil.  $^1H$  NMR (400 MHz, Chloroform-*d*)  $\delta$  7.72 – 7.62 (m, 3H), 7.32 – 7.10 (m, 9H), 7.00 (td,  $J = 7.5, 1.0$  Hz, 1H), 4.16 (dd,  $J = 7.9, 4.1$  Hz, 1H), 3.90 (dd,  $J = 11.3, 7.9$  Hz, 1H), 3.73 (dd,  $J = 11.3, 4.1$  Hz, 1H), 2.79 – 2.68 (m, 2H), 2.68 – 2.58 (m, 2H), 2.34 (s, 3H).  $^{13}C$  NMR (100 MHz,  $CDCl_3$ )  $\delta$  144.1, 141.7, 139.5, 133.7, 133.1, 129.6, 129.2, 128.5, 128.4, 127.2, 126.2, 125.3, 123.8, 115.1, 57.7, 55.9, 47.6, 36.4, 21.5. HRMS (ESI)  $m/z$  calcd for  $C_{23}H_{25}N_2O_2S$   $[M+H]^+$  393.1631, found 393.1642.

## 4. Mechanistic Studies

### 4.1. Radical Trapping Experiments

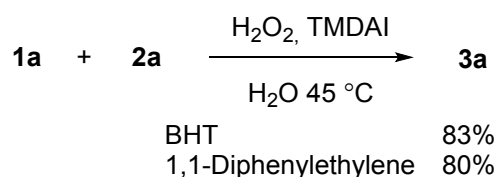

To a 5 mL tube was added **1a** (0.2 mmol), **2a** (0.3 mmol), H<sub>2</sub>O<sub>2</sub> (0.6 mmol, 30% in water), TMDAI (20% mol), radical scavenger (BHT or 1,1-Diphenylethylene, 0.6 mmol) and water (1 mL). The mixture was stirred at 45 °C for 12 hours, and extracted with DCM (1 mL × 3). The combined organic phase was washed with brine and dried over anhydrous Na<sub>2</sub>SO<sub>4</sub>. After the solvent had been completely removed, the residue was purified by column chromatography on silica gel to give the product **3**.

### 4.2 Effect of *N*-Substituents

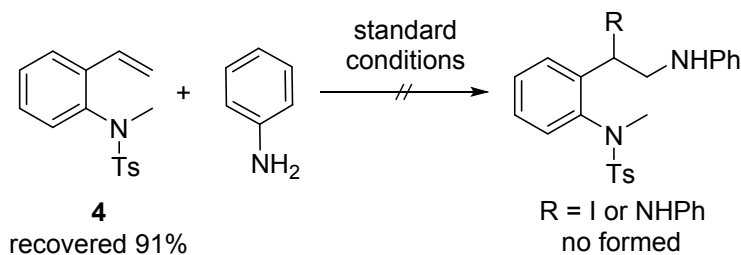

Standard conditions: **4** (0.2 mmol), aniline (0.3 mmol), H<sub>2</sub>O<sub>2</sub> (0.6 mmol, 30% in water), TMDAI (20% mol) in water (1 mL) at 45 °C for 12 hours.

### 4.3 kinetics Isotope Effect (KIE)

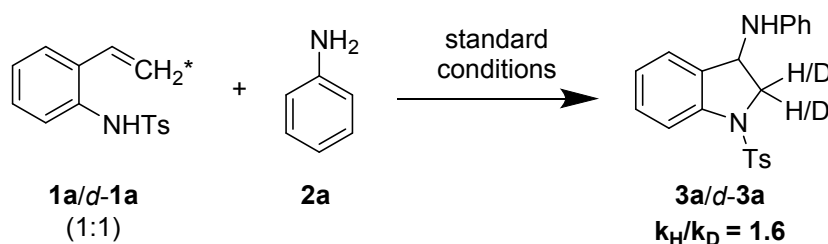

Substrate **1a** (0.1 mmol, 27.3 mg), **d-1a** (0.1 mmol, 27.5 mmol), aniline (0.3 mmol), TMDAI (20 mol%, 0.04 mmol), H<sub>2</sub>O<sub>2</sub> (30% aq, 3eq, 0.6 mmol) and H<sub>2</sub>O (1mL) were added to a 5 mL tube. The mixture was stirred at 45 °C for 30 min and then extracted with DCM (3 × 1 mL), the combined organic layers were dried over Na<sub>2</sub>SO<sub>4</sub>, filtered and evaporated under vacuum. The residue was analyzed by <sup>1</sup>H NMR without further purification. The <sup>1</sup>H NMR analysis showed that the ratio of **3a**

to *d*-**3a** was 1.6 :1 when compared with the standard  $^1\text{H}$  NMR spectrum of **3a**, in which the integration of the peak at 3.82 ppm was 0.62 instead of 1.

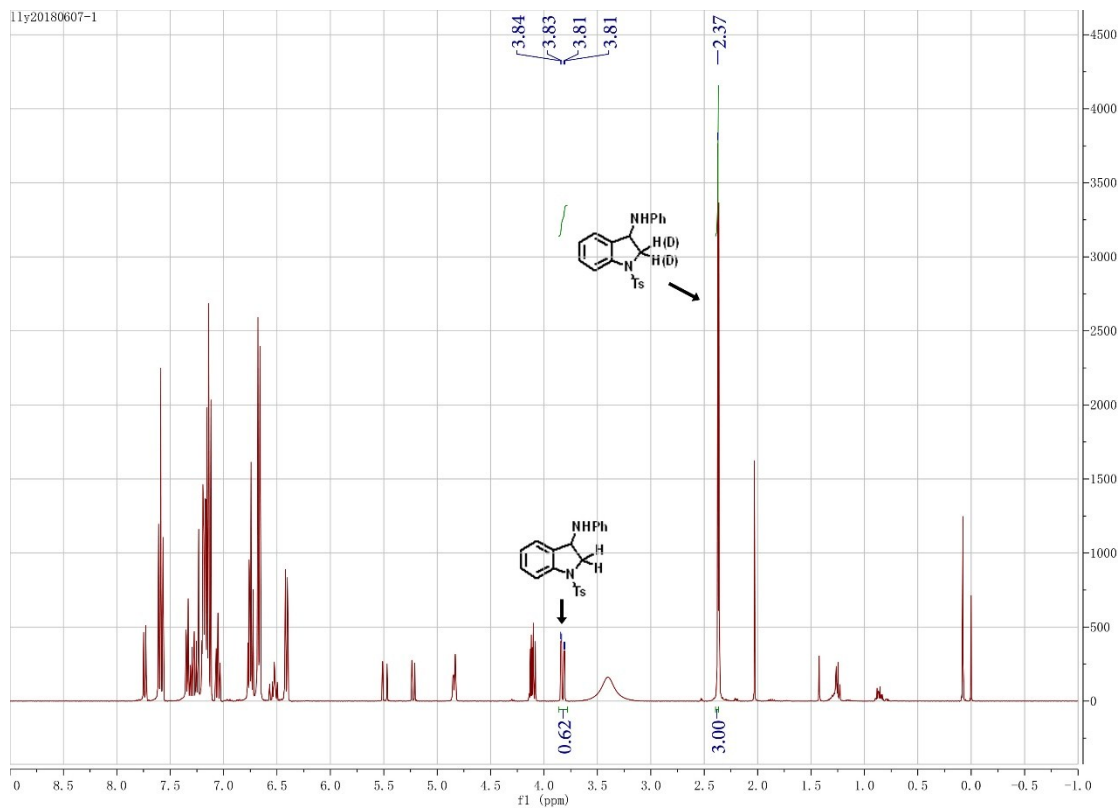

## 5. References

1. *Green Chem.*, **2017**, *19*, 2076-2079.

## 6. NMR spectra of products

### *N*-phenyl-1-tosylindolin-3-amine (3a)

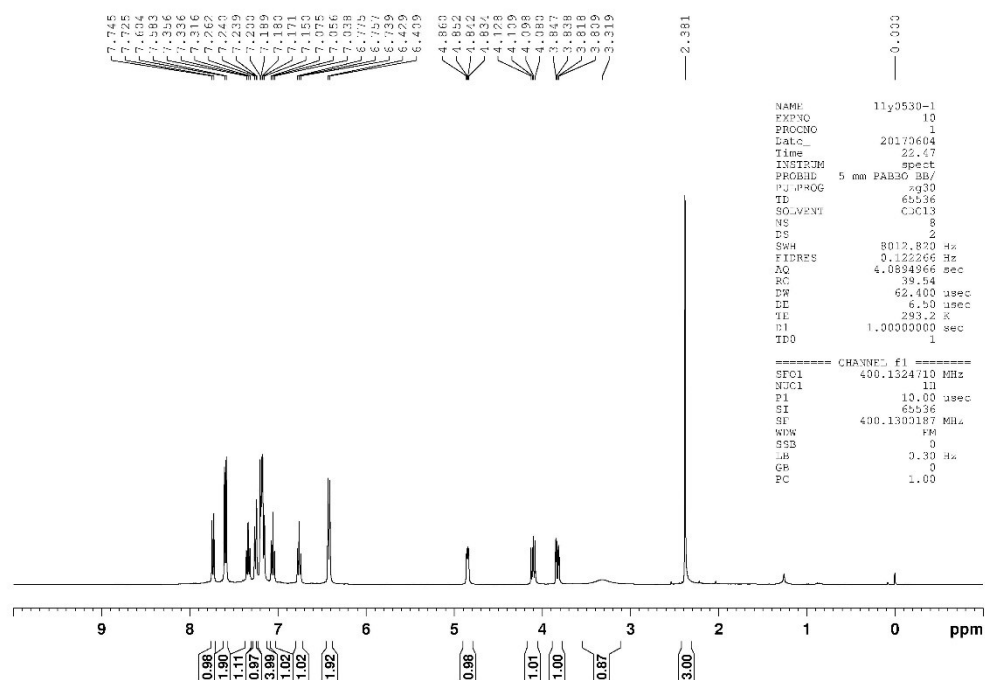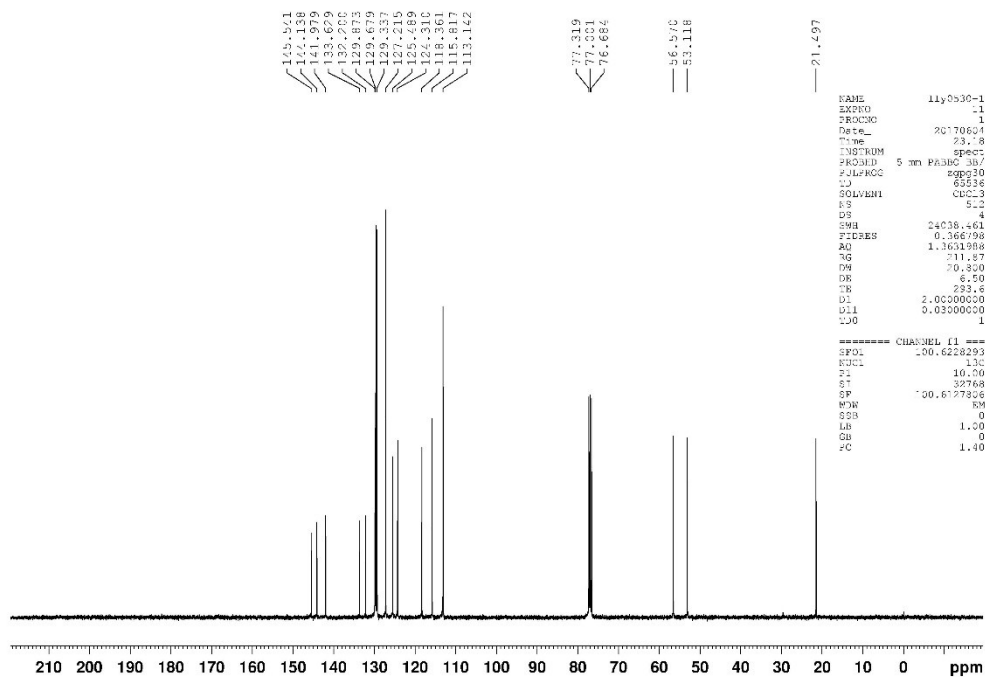

5-methyl-N-phenyl-1-tosylindolin-3-amine (3b)

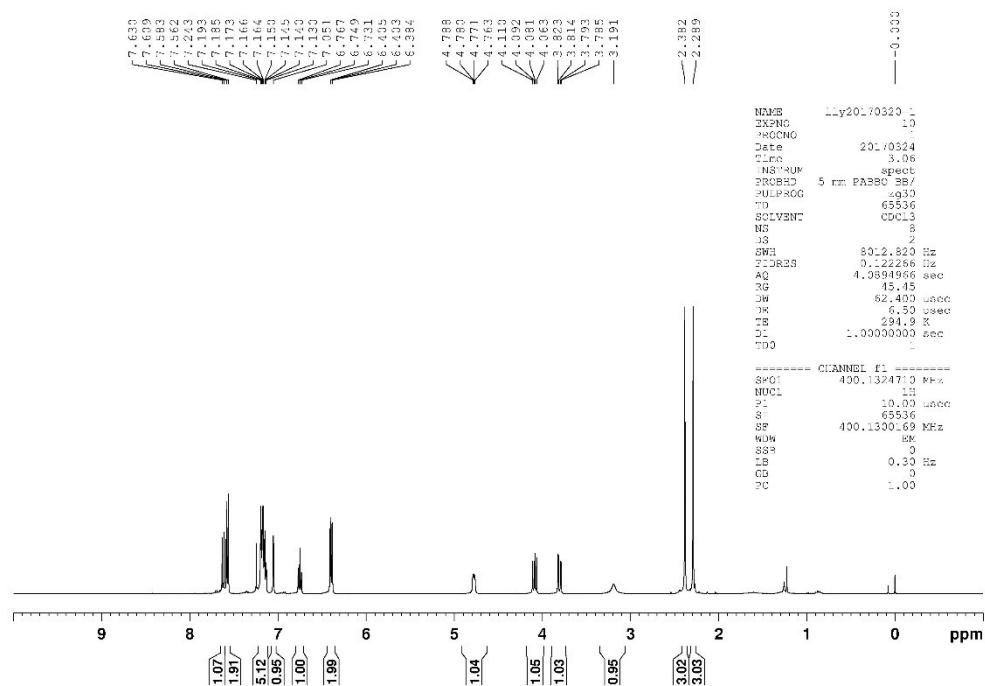

```

NAME      11y20170320-1
EXPNO    10
PROCNO   1
Date_     20170324
Time     3.06
INSTRUM  spect
PROBHD   5 mm PABBO BB/
PULPROG  zgpg30
TD       65536
SOLVENT  CDCl3
NS       5
DS       2
SWH      8012.820 Hz
FIDRES   0.122266 Hz
AQ       4.0894966 sec
RG       15.45
GB       62.400 usec
HW       6.50 usec
PC       291.9 s
DC       1.00000000 sec
TDO      1
----- CHANNEL f1 -----
SFO1    400.1324710 MHz
NUC1     13
P1       10.00 usec
S1       65536
SF       400.130069 MHz
WDW      EM
SSB      0
LB       0.30 Hz
GB       0
PC       1.00
  
```

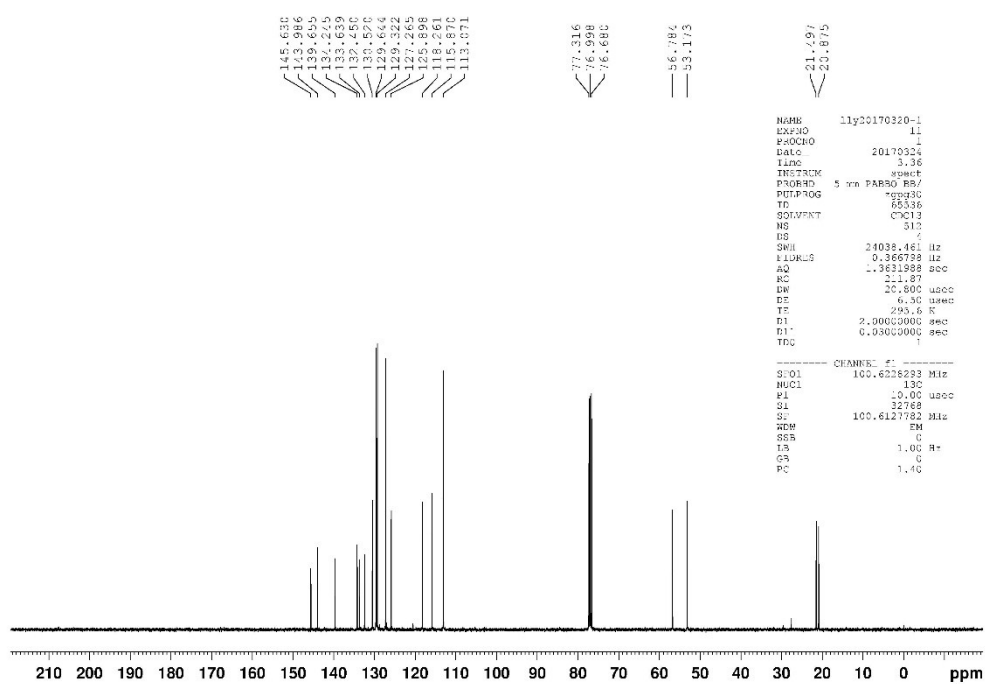

```

NAME      11y20170320-1
EXPNO    11
PROCNO   1
Date_     20170324
Time     3.36
INSTRUM  spect
PROBHD   5 mm PABBO BB/
PULPROG  zgpg30
TD       65536
SOLVENT  CDCl3
NS       5
DS       2
SWH      24038.461 Hz
FIDRES   0.366739 Hz
AQ       1.3831988 sec
RG       321.87
GB       20.800 usec
HW       6.50 usec
PC       295.6 s
DC       2.00000000 sec
TDO      0.03000000 sec
----- CHANNEL f1 -----
SFO1    100.6226233 MHz
NUC1     13C
P1       10.00 usec
S1       32768
SF       100.6127782 MHz
WDW      EM
SSB      0
LB       1.00 Hz
GB       0
PC       1.00
  
```

# 5-butyl-N-phenyl-1-tosylindolin-3-amine (3c)

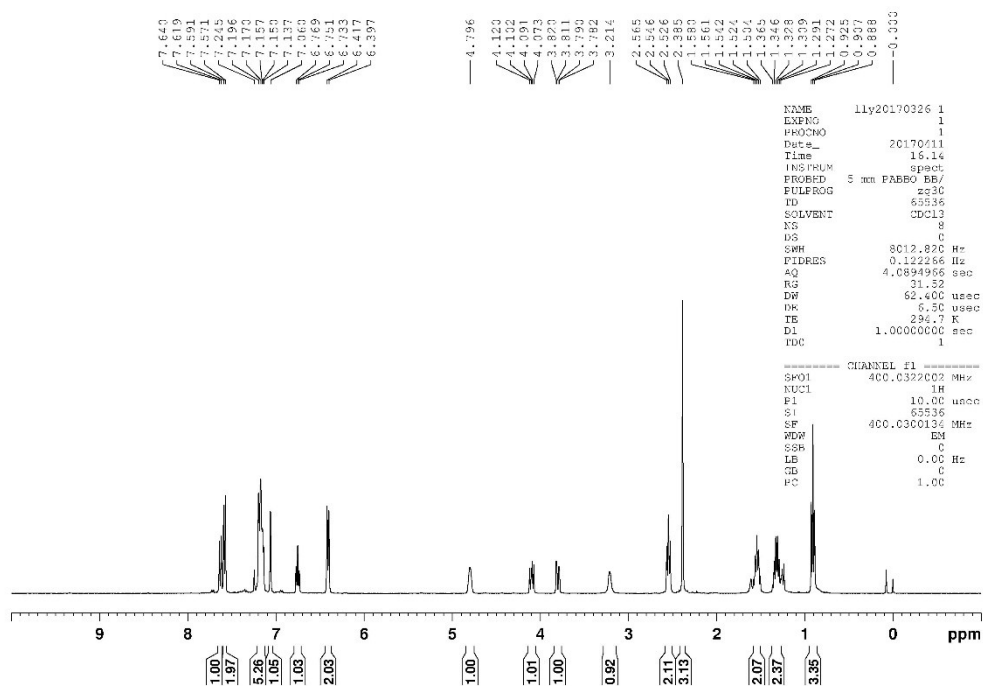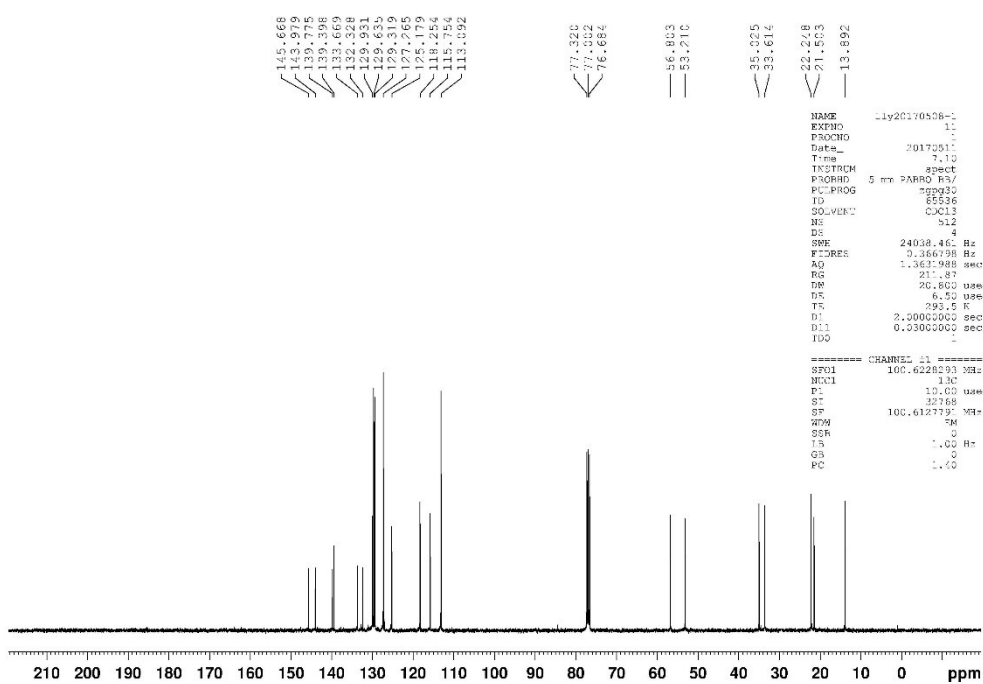

# 5-(tert-butyl)-N-phenyl-1-tosylindolin-3-amine (3d)

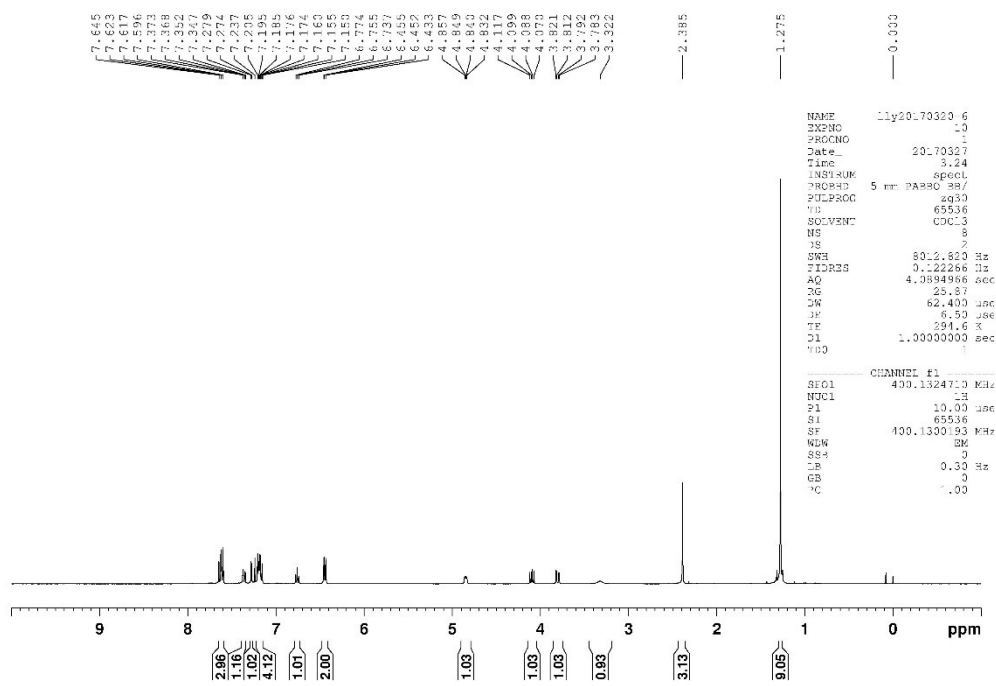

```

NAME      11y20170320_6
EXPNO    1
PROCNO   1
Date_    20170327
Time     3.24
INSTRUM  spect
PROBHD   5 mm PABBO BB/
PULPROG  zgpg30
TD       65536
SOLVENT  CDCl3
NS       8
DS       2
SWH      3912.820 Hz
FIDRES   0.22288 Hz
AQ       4.0894866 sec
RG       25.87
WDW      EM
GB       0
PC       6.50 usec
TE       291.6 K
D1       1.30000000 sec
TD0      1

----- CHANNEL f1 -----
SFO1     400.132470 MHz
NUC1     13C
P1       10.00 usec
S1       65536
SF       100.627790 MHz
WDW      EM
SSB      0
GB       0
PC       1.40
  
```

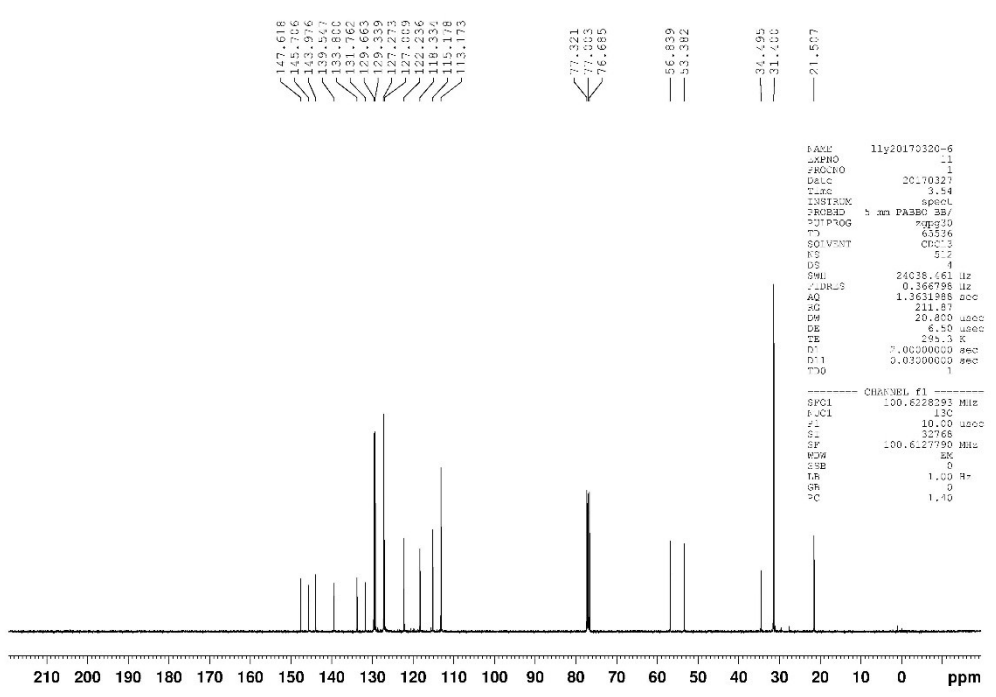

```

NAME      11y20170320-6
EXPNO    1
PROCNO   1
DELTC    20170327
Time     3.54
INSTRUM  spect
PROBHD   5 mm PABBO BB/
PULPROG  zgpg30
TD       65536
SOLVENT  CDCl3
NS       4
DS       1
SWH      24038.461 Hz
FIDRES   0.368798 Hz
AQ       1.3621888 sec
RG       211.87
WDW      EM
GB       0
PC       6.50 usec
TE       299.3 K
D1       0.00000000 sec
D11      0.03000000 sec
TD0      1

----- CHANNEL f1 -----
SFO1     100.627790 MHz
NUC1     13C
P1       10.00 usec
S1       32768
SF       100.627790 MHz
WDW      EM
SSB      0
GB       0
PC       1.40
  
```

# 5-nitro-N-phenyl-1-tosylindolin-3-amine (3e)

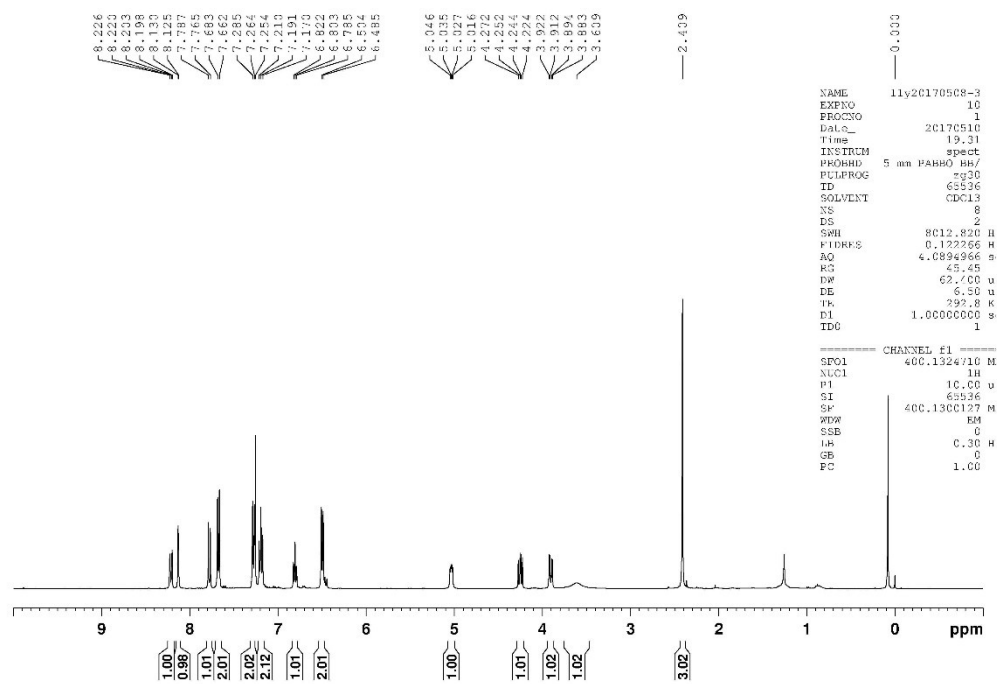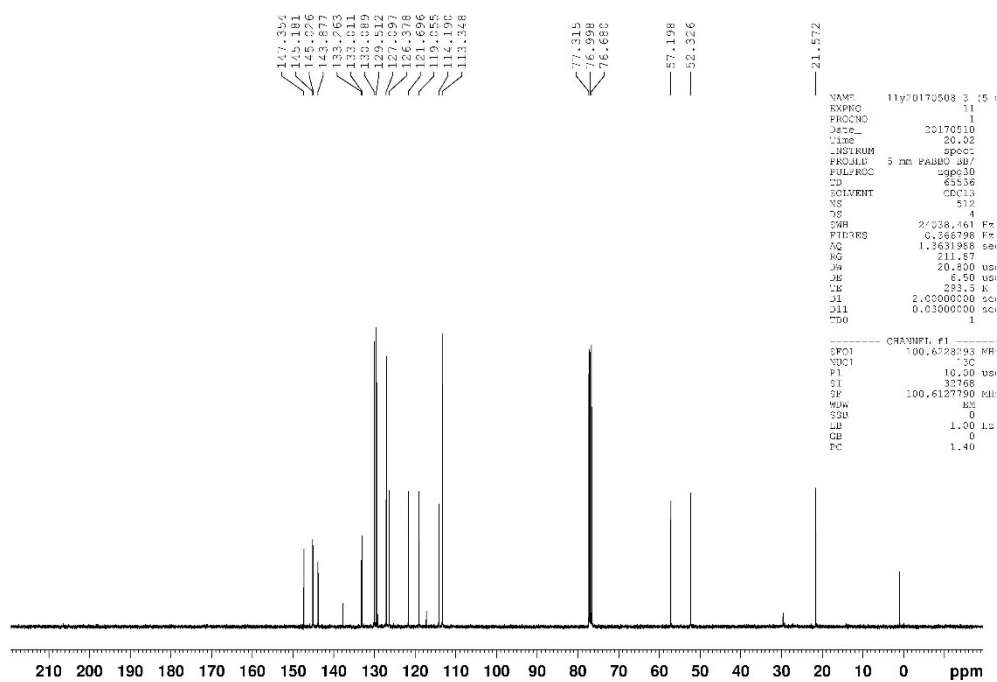



5-fluoro-N-phenyl-1-tosylindolin-3-amine (3f)

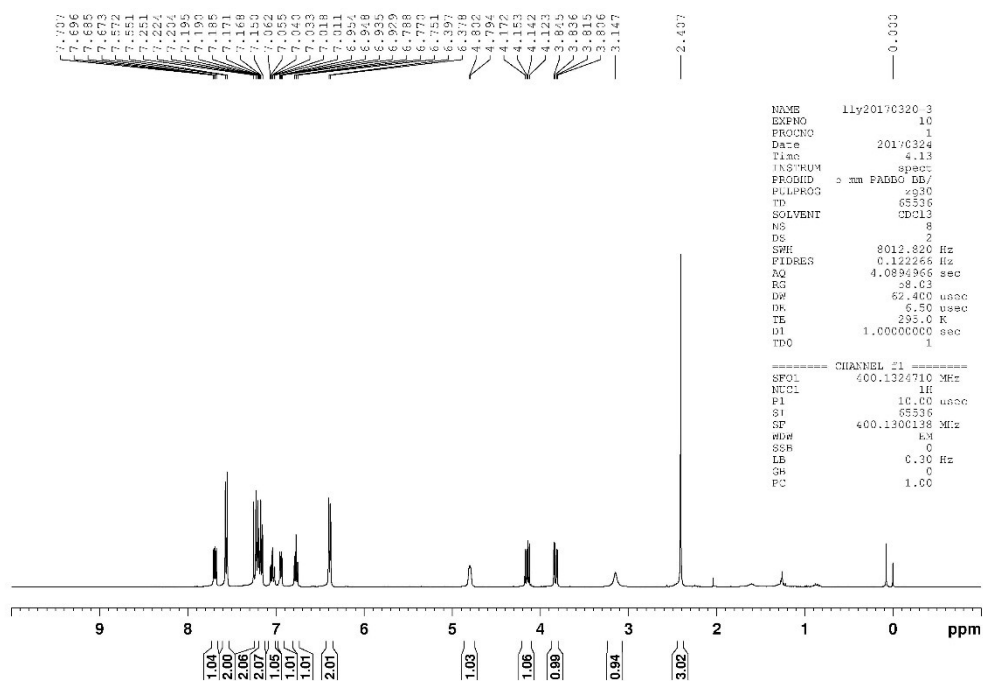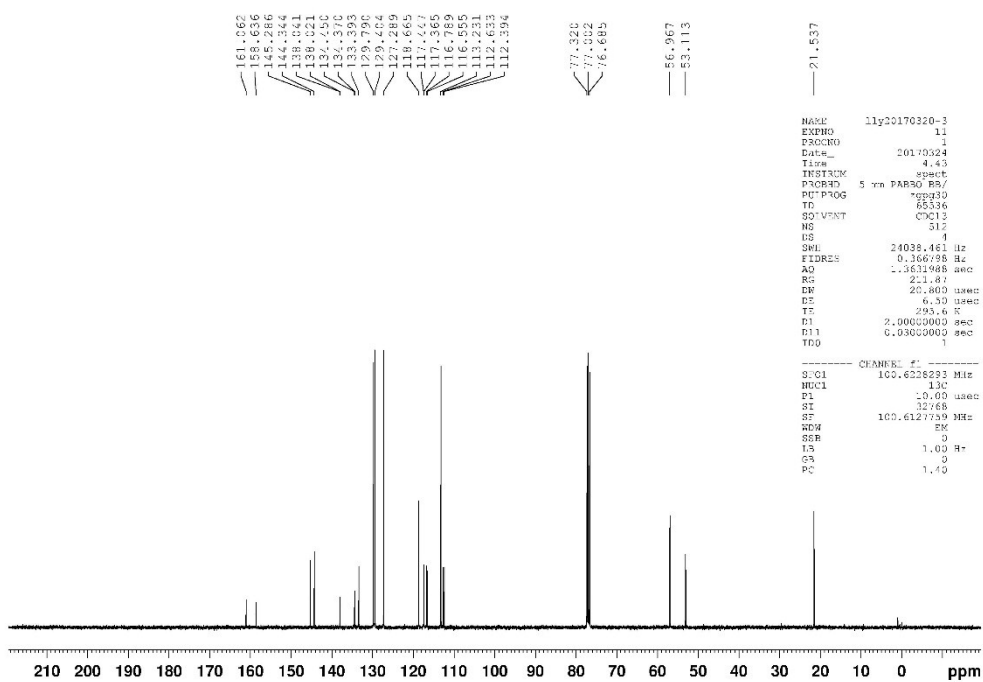

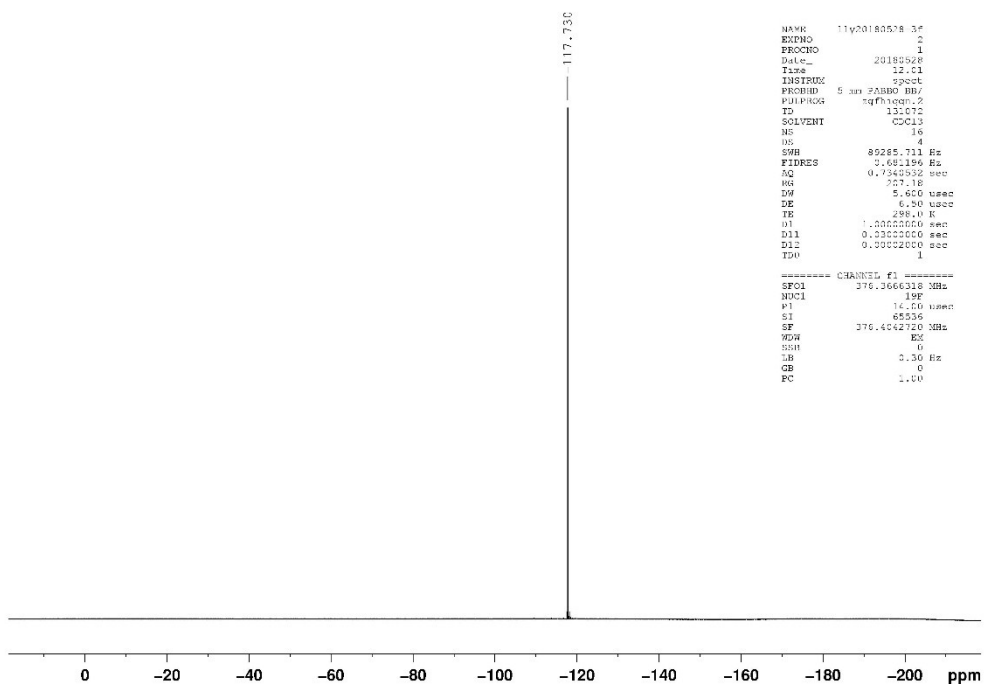

# 5-chloro-N-phenyl-1-tosylindolin-3-amine (3g)

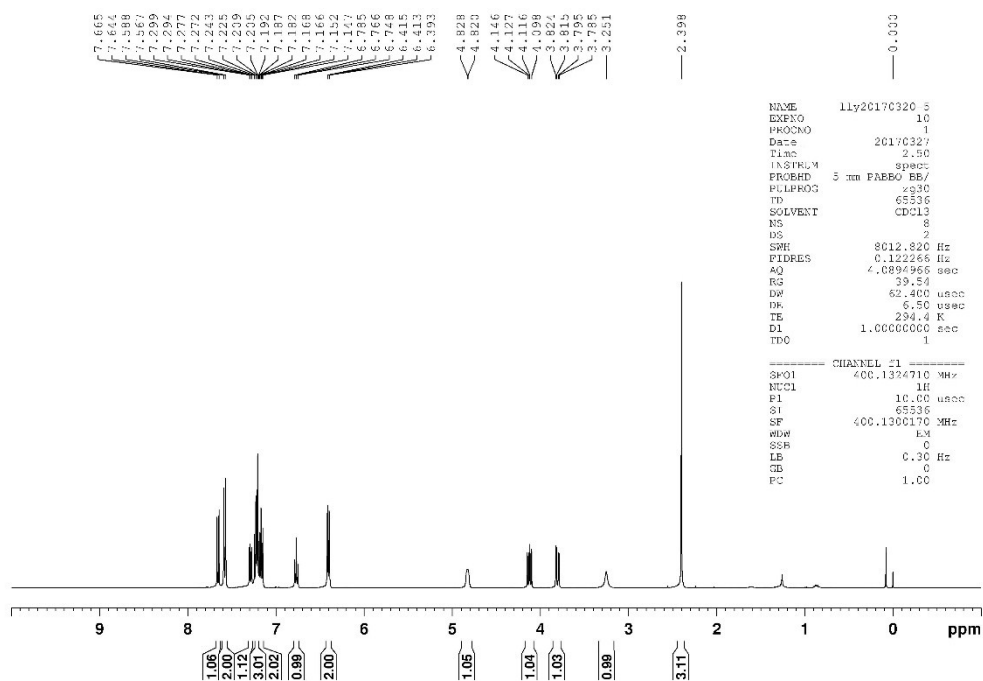

```

NAME      11y20170320 3
EXPNO    10
PROCNO    1
Date_     20170227
Time      2.50
INSTRUM   spect
PROBHD    5 mm PABBO BB/
PULPROG   zgpg30
TD         65536
SOLVENT   CDCl3
NS         2
DS         2
SWH        8012.820 Hz
FIDRES    0.122266 Hz
AQ         4.0894965 sec
RG         39.54
DW         62.400 usec
DE         6.50 usec
TE         298.2 K
D1         1.00000000 sec
TDO        1

===== CHANNEL f1 =====
SFO1      400.1324710 MHz
NUC1       1H
P1         10.00 usec
SI         65536
SF         400.1300170 MHz
WDW        EM
SSB        0
LB         0.30 Hz
GB         0
PC         1.00
    
```

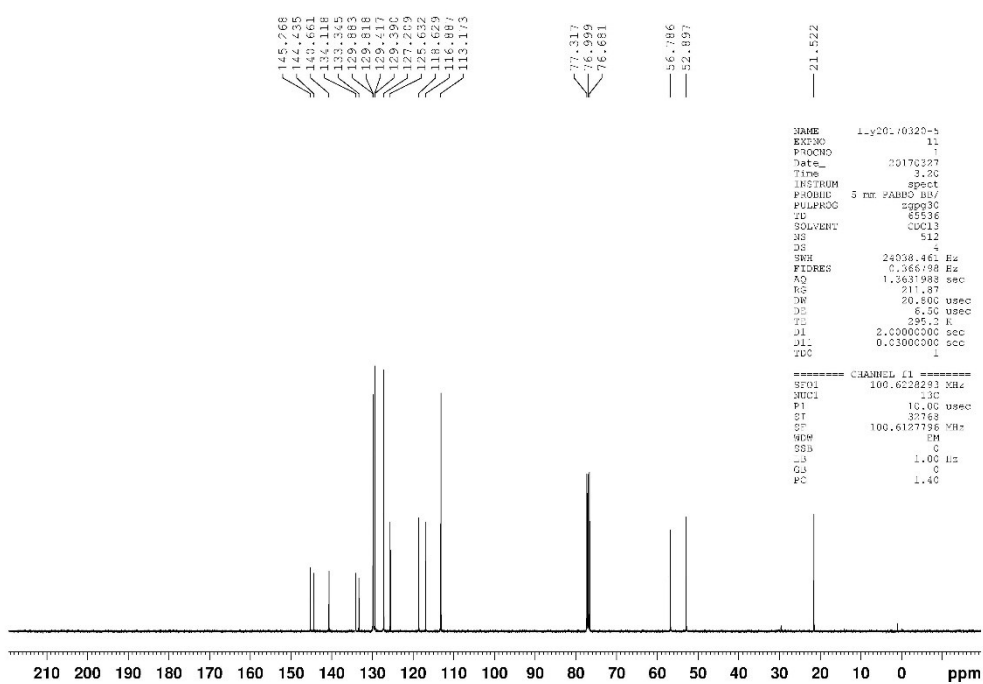

```

NAME      1-y20170320-3
EXPNO     11
PROCNO    1
Date_     20170227
Time      3.20
INSTRUM   spect
PROBHD    5 mm PABBO BB/
PULPROG   zgpg30
TD         65536
SOLVENT   CDCl3
NS         2
DS         2
SWH        24038.461 Hz
FIDRES    0.368798 Hz
AQ         1.3431981 sec
RG         211.87
DW         20.500 usec
DE         6.50 usec
TE         298.2 K
D1         2.00000000 sec
TDO        0.03000000 sec
ZDC        1

===== CHANNEL f1 =====
SFO1      100.6228283 MHz
NUC1       13C
P1         10.00 usec
SI         32768
SF         100.6127736 MHz
WDW        EM
SSB        0
LB         1.00 Hz
GB         0
PC         1.40
    
```

# 5-methoxy-N-phenyl-1-tosylindolin-3-amine (3h)

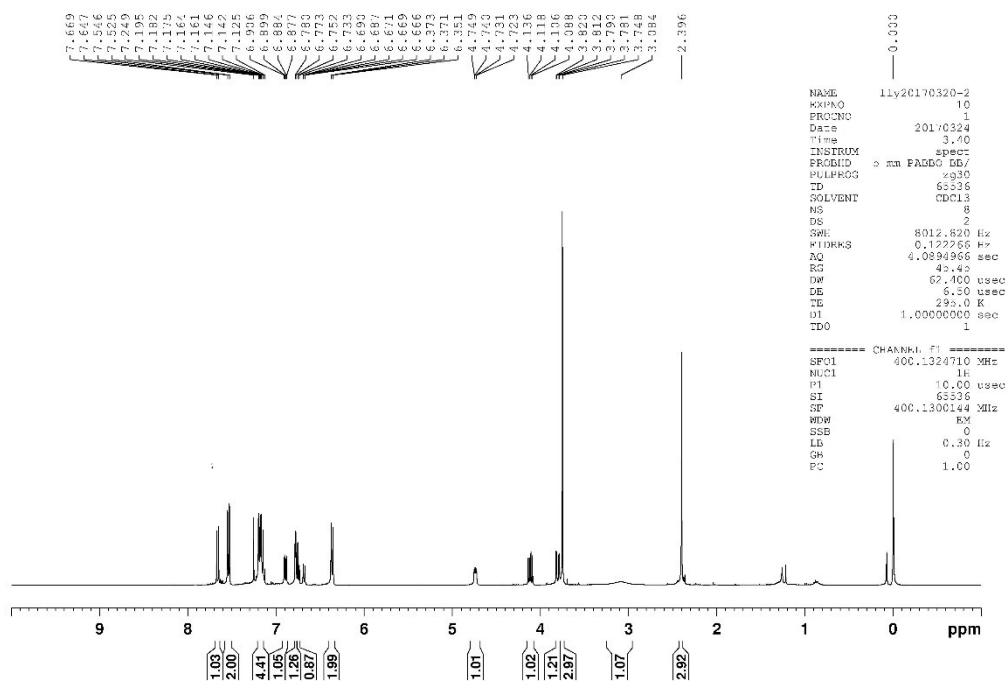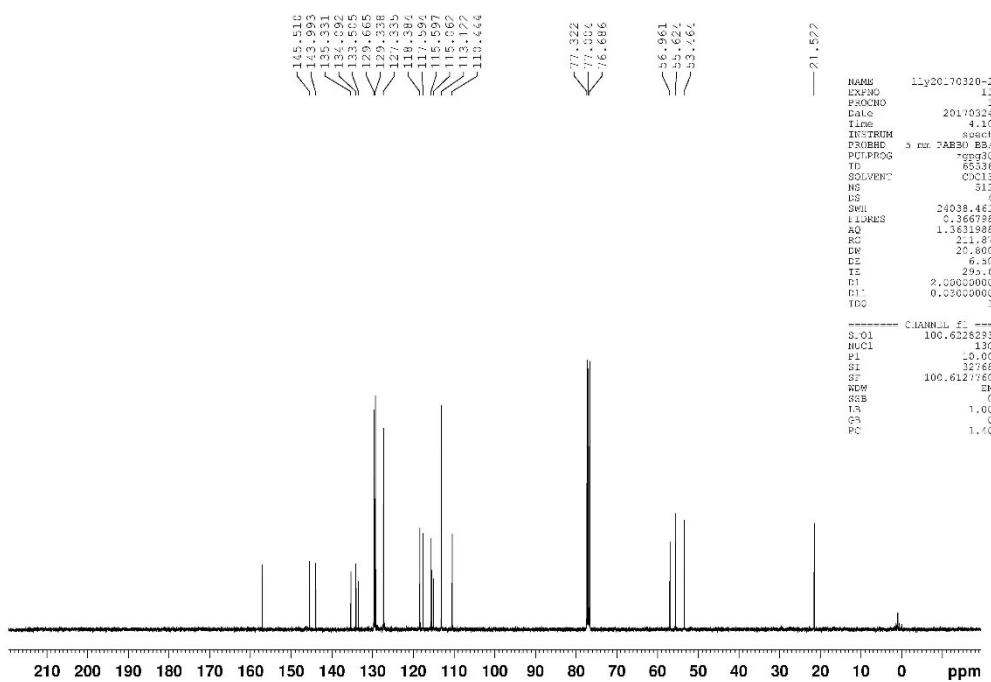

**N-(4-fluorophenyl)-1-tosylindolin-3-amine (3i)**

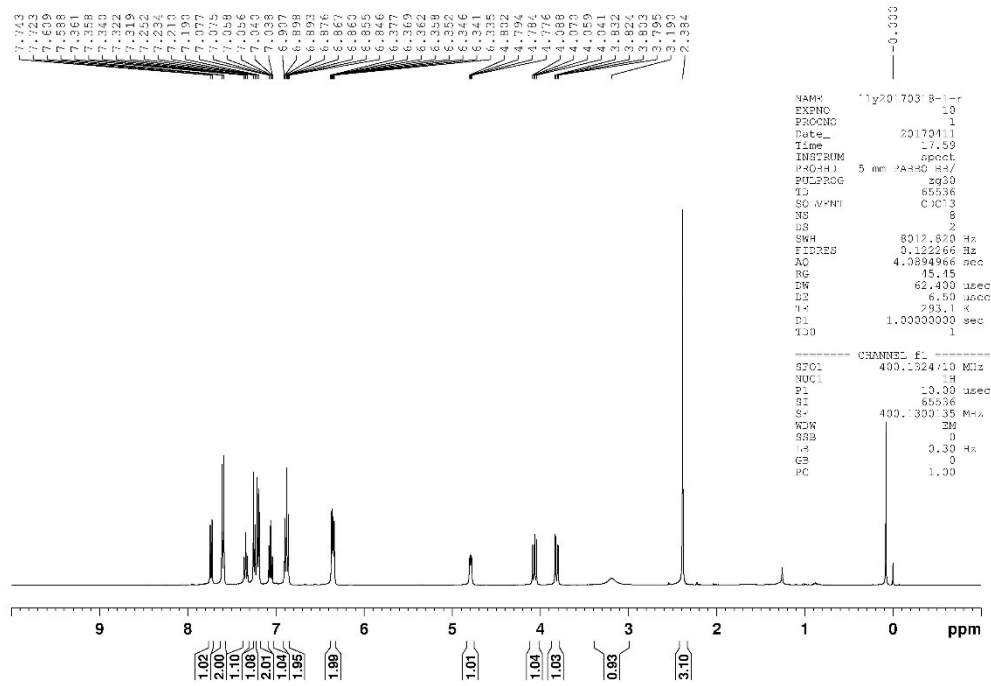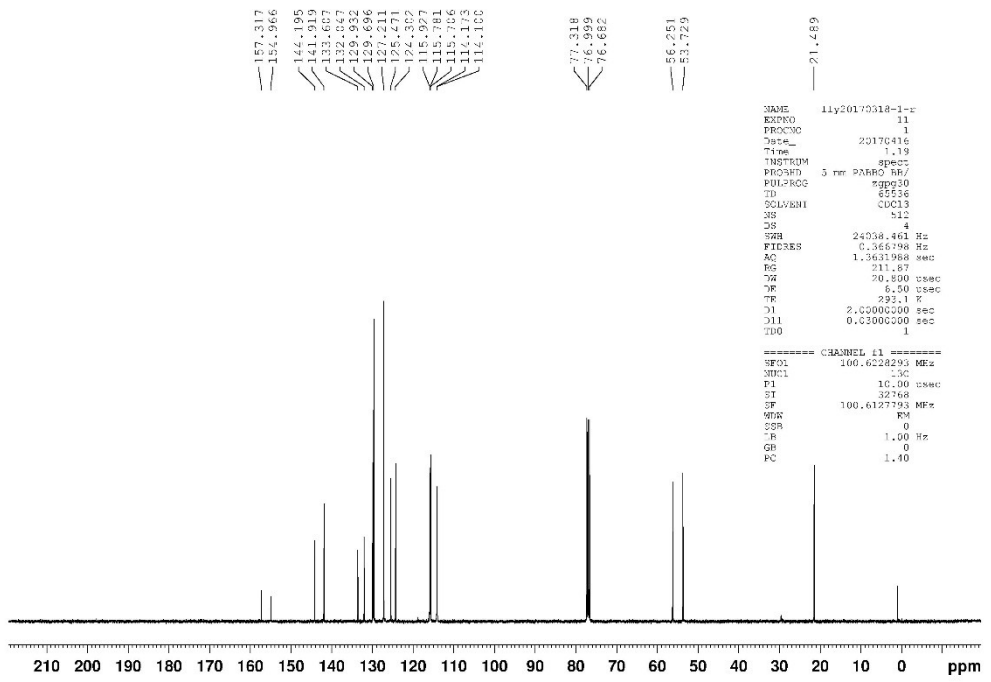

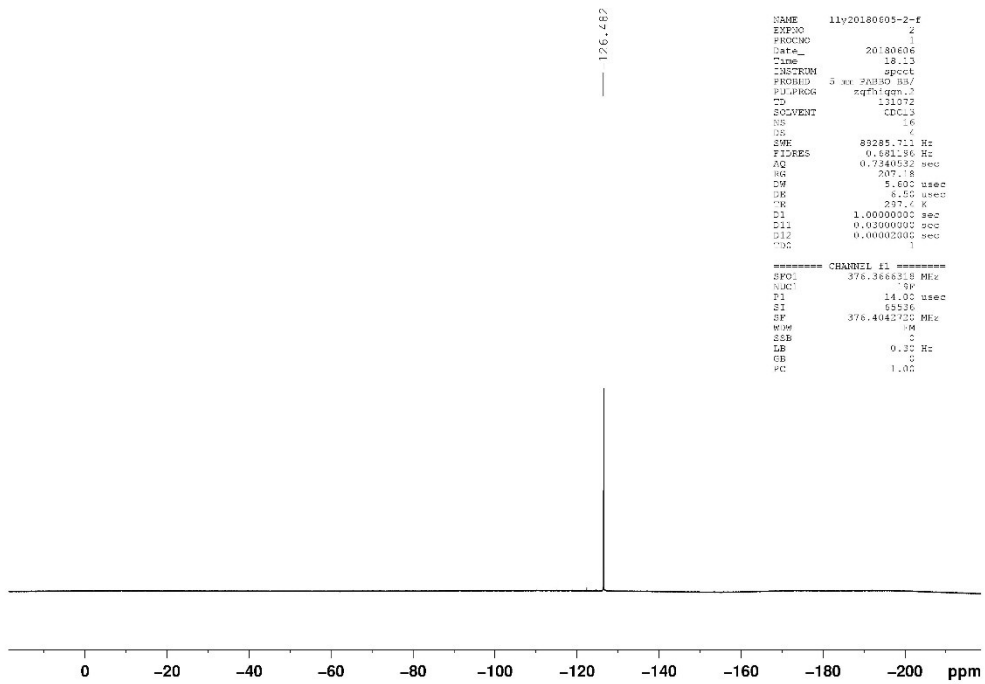

# N-(4-bromophenyl)-1-tosylindolin-3-amine (3j)

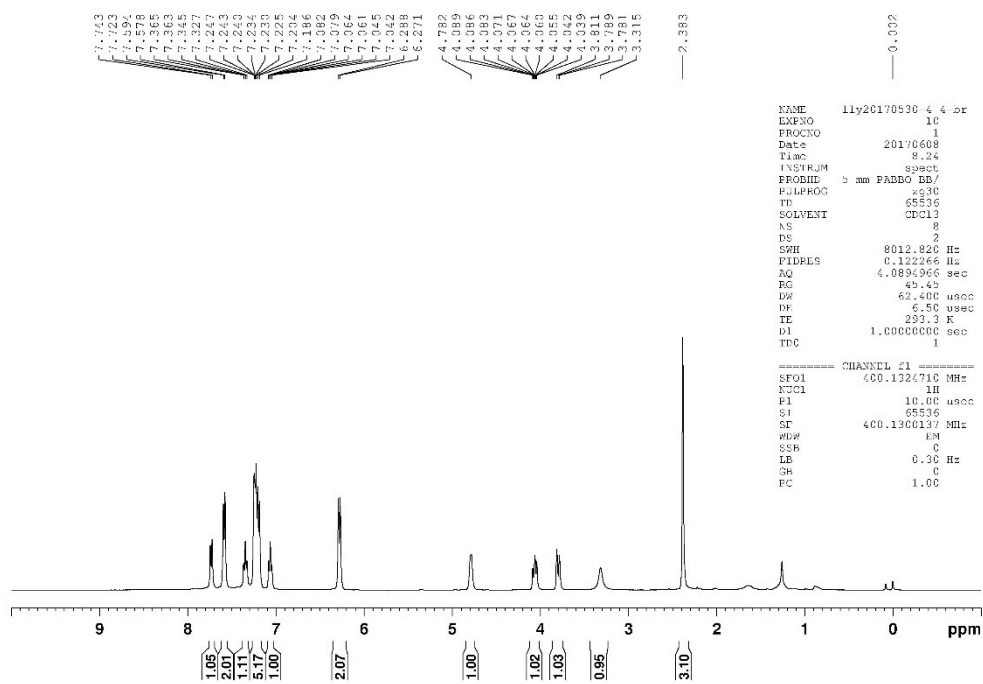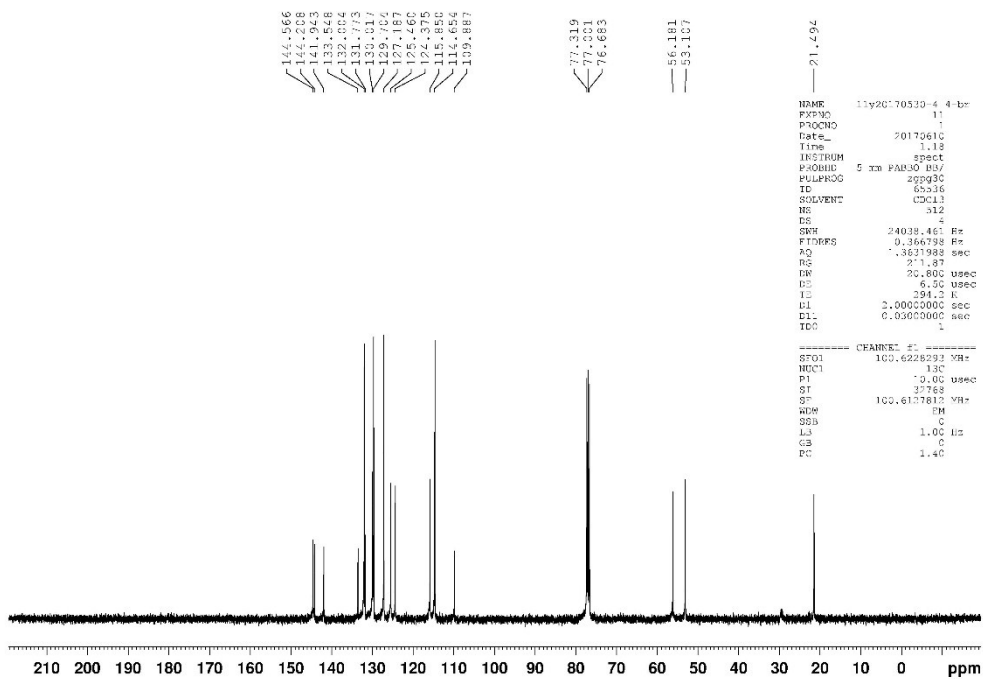

**N-(4-chlorophenyl)-1-tosylindolin-3-amine (3k)**

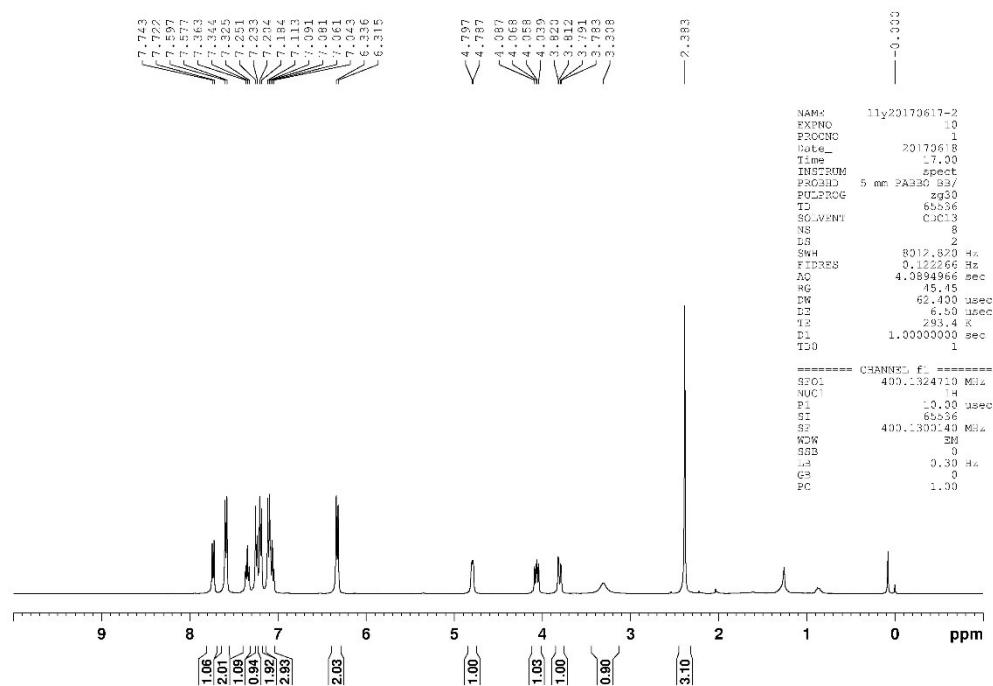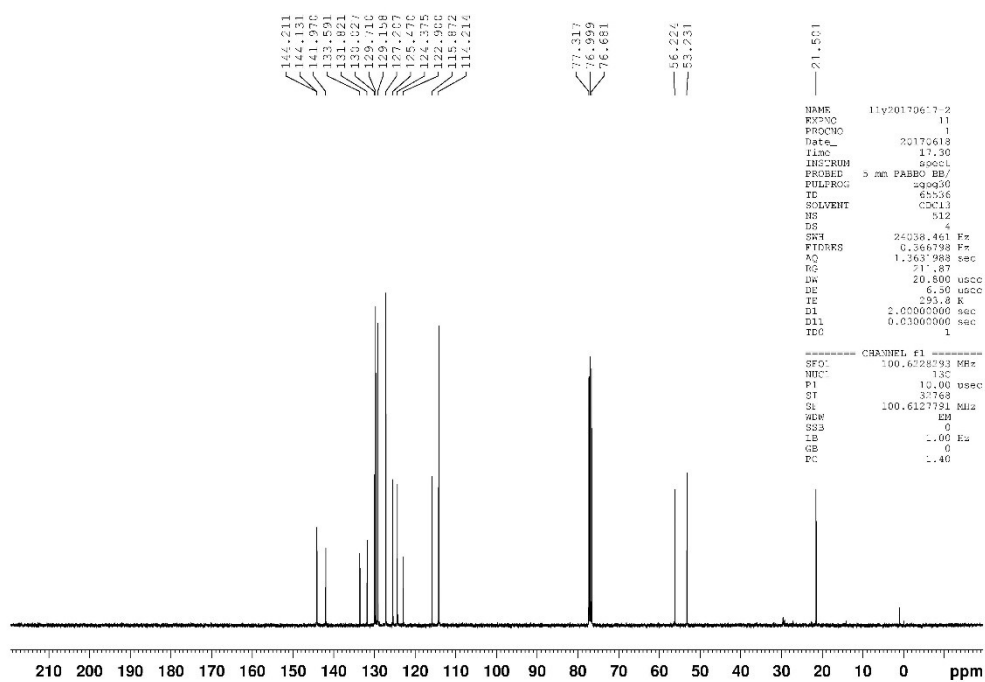



**N-(3-chlorophenyl)-1-tosylindolin-3-amine (31)**

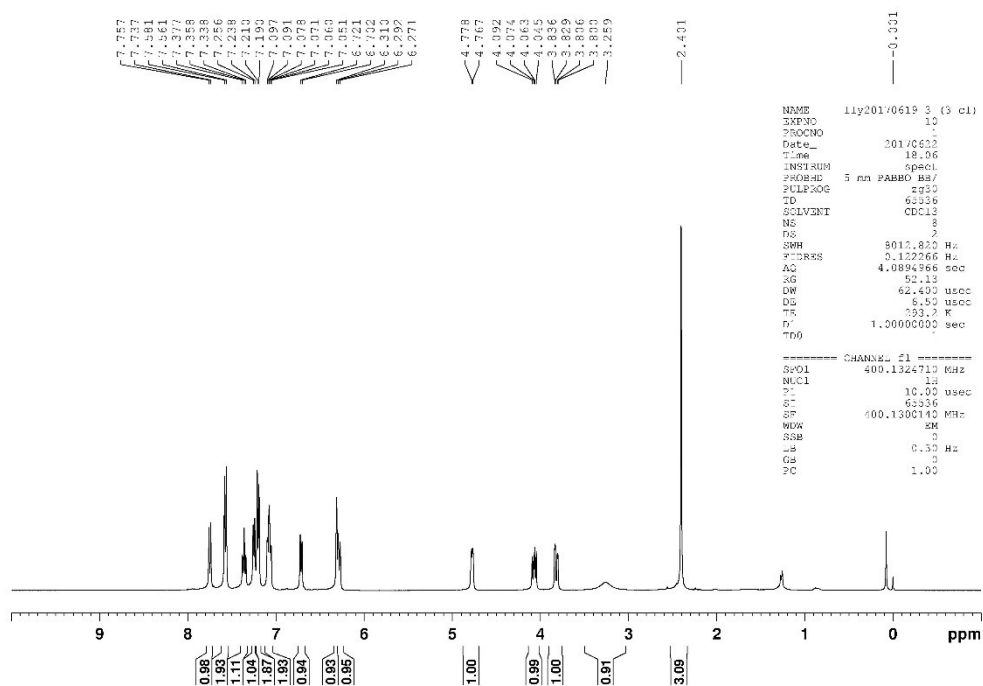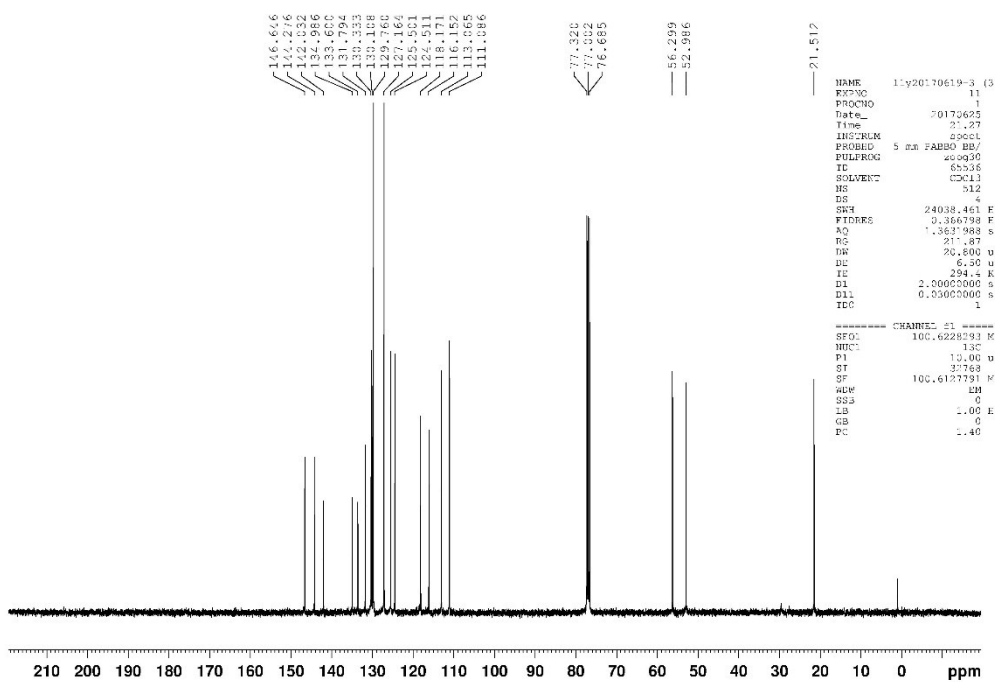

**N-(2-chlorophenyl)-1-tosylindolin-3-amine (3m)**

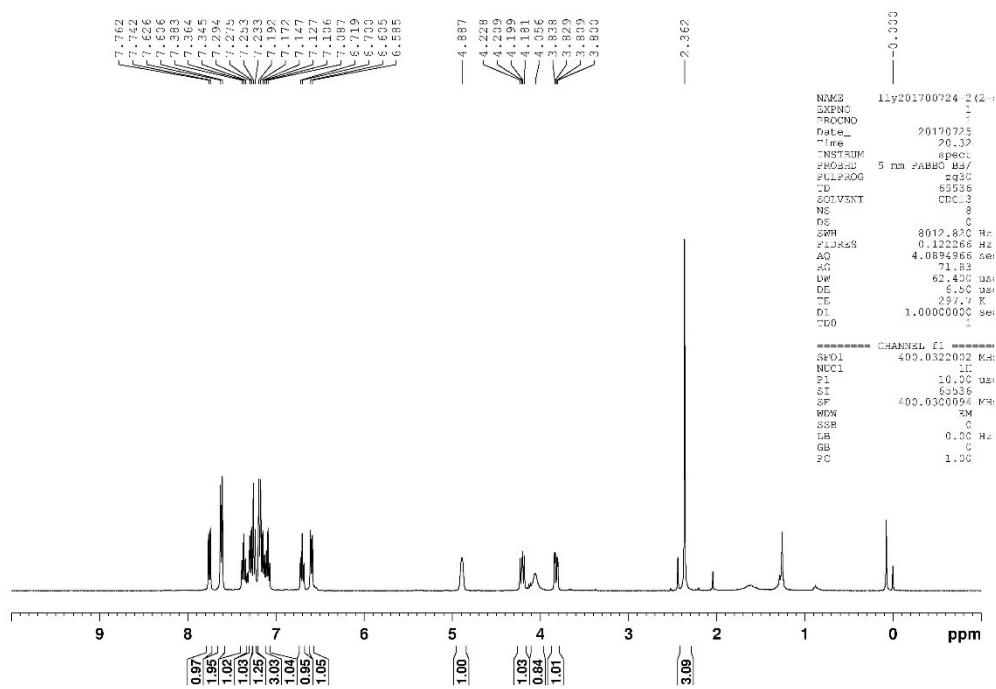

```

NAME      11y201700724_2(2-
EXPNO    1
PROCNO   1
Date_    20170725
Time     20.37
INSTRUM  spect
PROBHD   5 mm PABBO Bb/
PULPROG  zgpg30
TD        65536
SOLVENT  CDCl3
NS        3
DS        4
SWH       8019.820 Hz
FIDRES   0.122266 Hz
AQ        4.0894966 sec
RG        71.83
DW        62.400 usec
DE        6.30 usec
TE        297.7 K
D1        1.0000000 sec
D2        -
===== CHANNEL f1 =====
SFO1     400.032002 MHz
NUC1     13C
P1        10.00 usec
SI        32768
SF        400.030000 MHz
WDW       EM
SSB       0
GB        0.00 Hz
PC        1.00
    
```

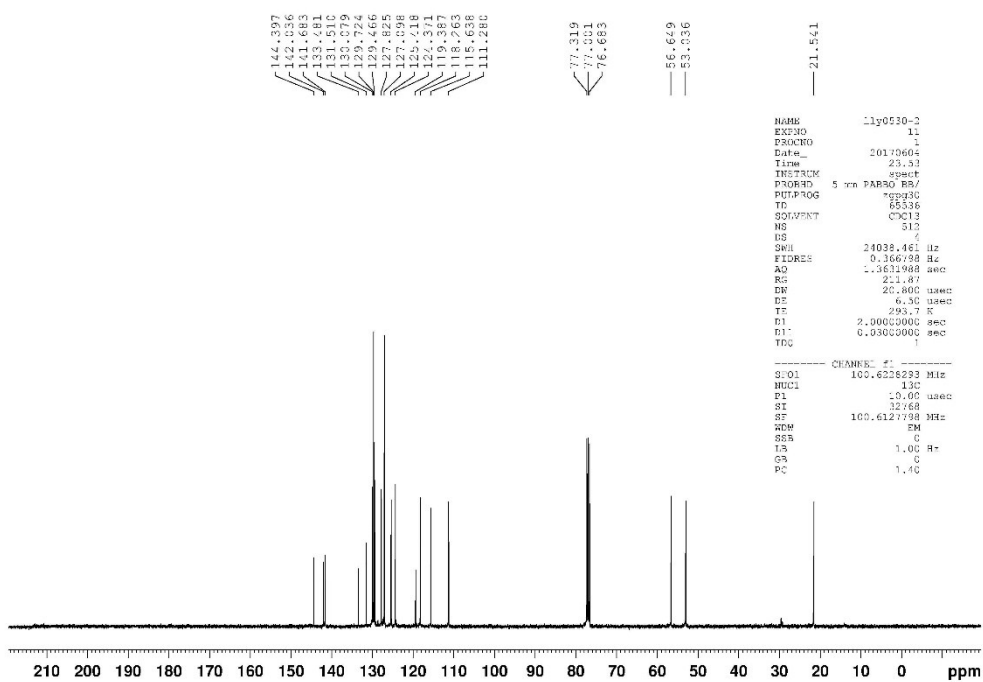

```

NAME      11y0530-2
EXPNO    1
PROCNO   1
Date_    20170604
Time     23.53
INSTRUM  spect
PROBHD   5 mm PABBO Bb/
PULPROG  zgpg30
TD        65536
SOLVENT  CDCl3
NS        3
DS        4
SWH       24038.461 Hz
FIDRES   0.366798 Hz
AQ        1.3631988 sec
RG        221.87
DW        20.800 usec
DE        6.30 usec
TE        293.7 K
D1        2.0000000 sec
D2        0.0300000 sec
D3        -
===== CHANNEL f1 =====
SFO1     100.6258293 MHz
NUC1     13C
P1        10.00 usec
SI        32768
SF        100.6127798 MHz
WDW       EM
SSB       0
GB        1.00 Hz
PC        1.00
    
```

**N-(4-methoxyphenyl)-1-tosylindolin-3-amine (3n)**

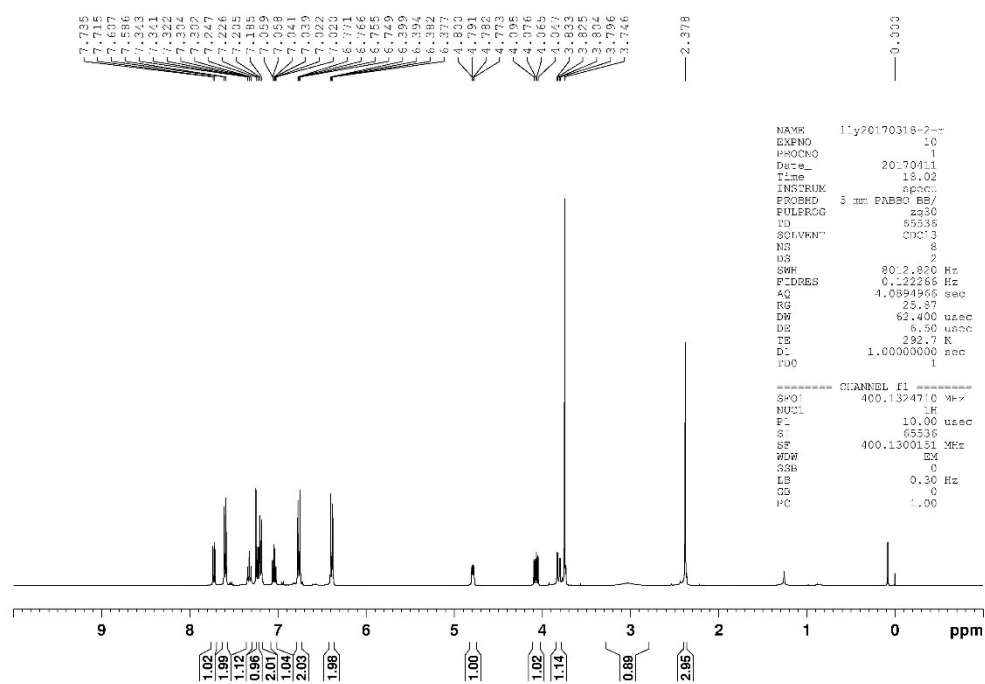

```

NAME 11y20170318-2--
EXPNO 10
PROCNO 1
DATE_ 20170411
TIME 18.02
INSTRUM spect
PROBHD 5 mm PABBO BB/
PULPROG zgpg30
TD 65536
SOLVENT CDCl3
NS 8
DS 2
SWH 801.2820 Hz
FIDRES 0.22265 Hz
AQ 4.0894965 sec
RG 25.87
DW 62.400 usec
DE 6.50 usec
TE 292.7 K
D1 1.00000000 sec
TD0 1
----- CHANNEL f1 -----
SFO1 400.1324710 MHz
NUC1 13C
P1 10.00 usec
SI 65536
SF 400.1300151 MHz
WDW EM
SSB 0
LB 0.30 Hz
GB 0
PC 1.00
  
```

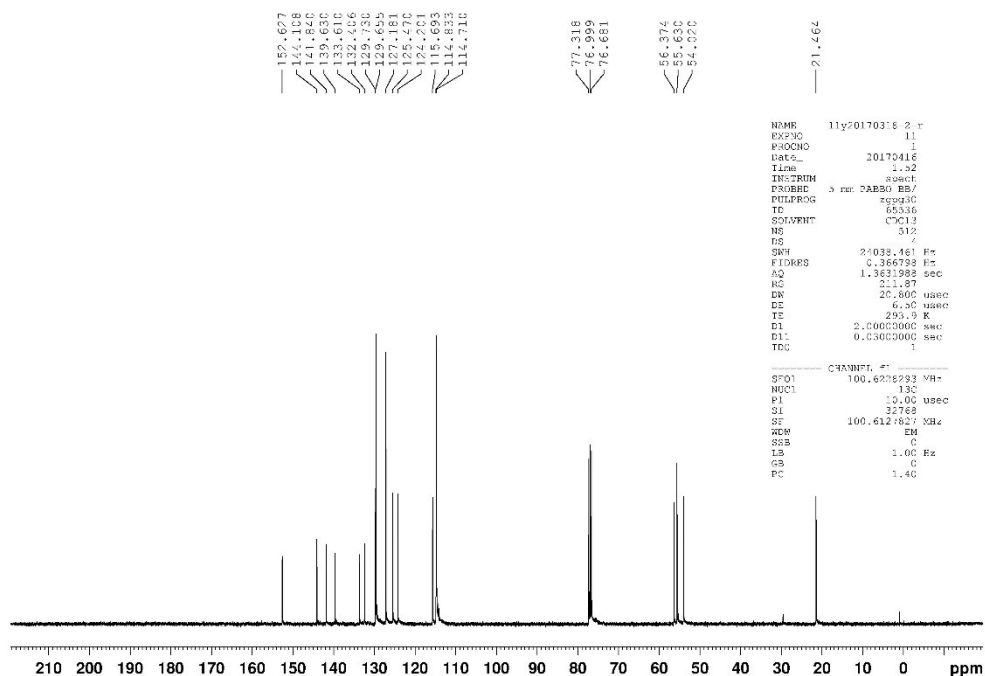

```

NAME 11y20170318 2 r
EXPNO 11
PROCNO 1
DATE_ 20170416
TIME 4.52
INSTRUM spect
PROBHD 5 mm PABBO BB/
PULPROG zgpg30
TD 65536
SOLVENT CDCl3
NS 312
DS 2
SWH 24038.461 Hz
FIDRES 0.366798 Hz
AQ 1.3631988 sec
RG 211.87
DW 20.800 usec
DE 6.50 usec
TE 293.9 K
D1 2.00000000 sec
D11 0.05000000 sec
TEC 1
----- CHANNEL f1 -----
SFO1 100.6216293 MHz
NUC1 13C
P1 10.00 usec
SI 32768
SF 100.6127827 MHz
WDW EM
SSB 0
LB 1.00 Hz
GB 0
PC 1.40
  
```

***N*-(3-methoxyphenyl)-1-tosylindolin-3-amine (3o)**

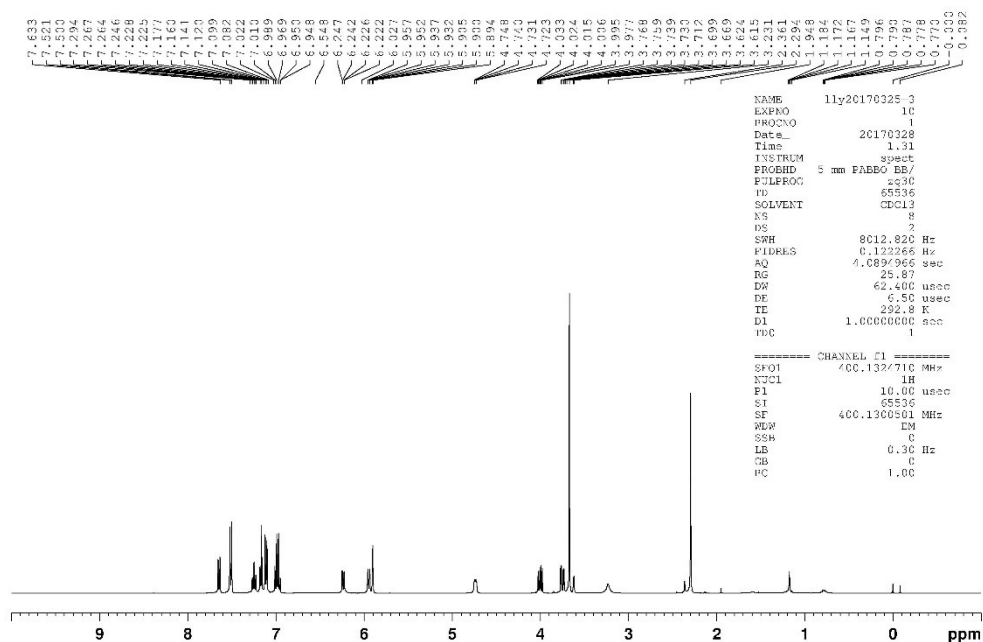

```

NAME      11y20170325-3
EXPNO     10
PROCNO     1
Date_     20170328
Time      1.31
INSTRUM   spect
PROBHD    5 mm PABBO B3/
PULPROG   zgpg30
TD         65536
SOLVENT   CDCl3
NS         8
DS         2
SWH       8012.820 Hz
FIDRES    0.122265 Hz
AQ        4.0894966 sec
RG         25.87
DW        62.400 usec
DE        6.50 usec
TE        292.8 K
D1        1.00000000 sec
D11       1
DEC       1

===== CHANNEL f1 =====
SF01     400.1324710 MHz
NUC1      1H
P1        10.00 usec
PT        35536
SF        400.1300501 MHz
WDW       EM
SFB       0
GB        0.30 Hz
PC        1.00
    
```

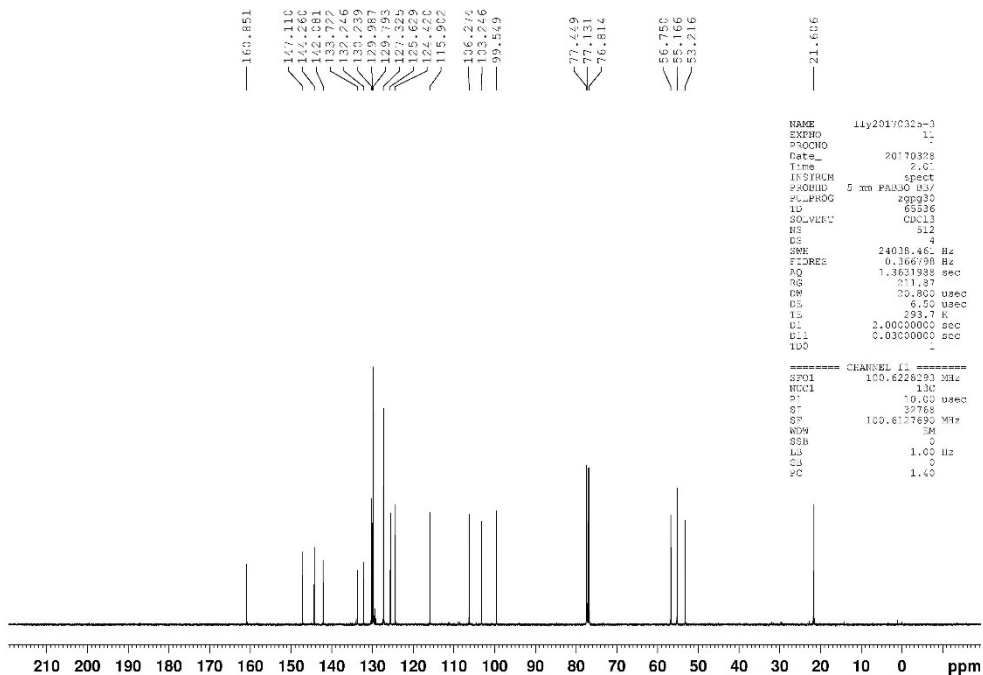

```

NAME      11y20170325-3
EXPNO     10
PROCNO     1
Date_     20170328
Time      2.01
INSTRUM   spect
PROBHD    5 mm PABBO B3/
PULPROG   zgpg30
TD         65536
SOLVENT   CDCl3
NS         4
DS         4
SWH       24038.462 Hz
FIDRES    0.166798 Hz
AQ        1.3621988 sec
RG         211.37
DW        30.800 usec
DE        6.60 usec
TE        293.7 K
D1        2.00000000 sec
D11       0.03000000 sec
D12       1
DEC       1

===== CHANNEL f1 =====
SF01     100.6282931 MHz
NUC1      13C
P1        10.00 usec
PT        32768
SF        100.6127690 MHz
WDW       EM
SFB       0
GB        1.00 Hz
PC        1.40
    
```

**N-(2-methoxyphenyl)-1-tosylindolin-3-amine (3p)**

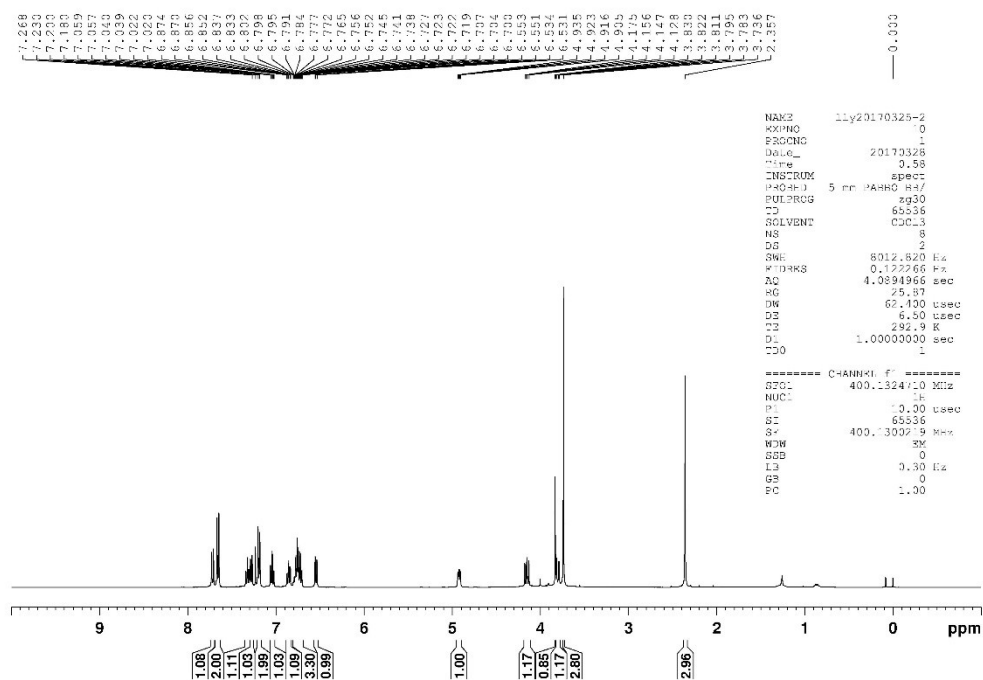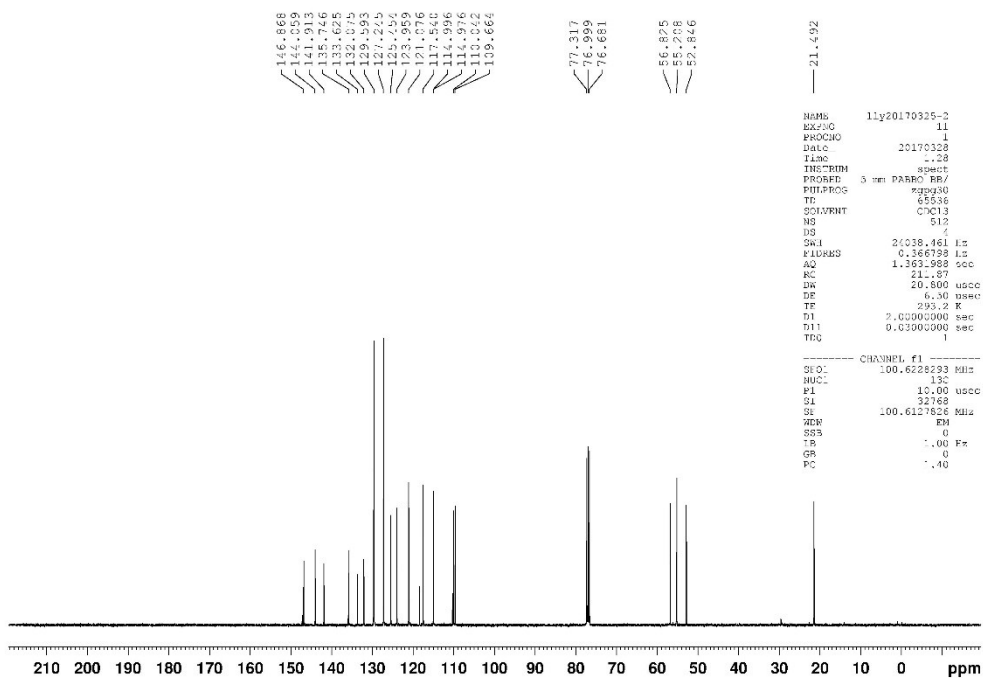

**N-(p-tolyl)-1-tosylindolin-3-amine (3q)**

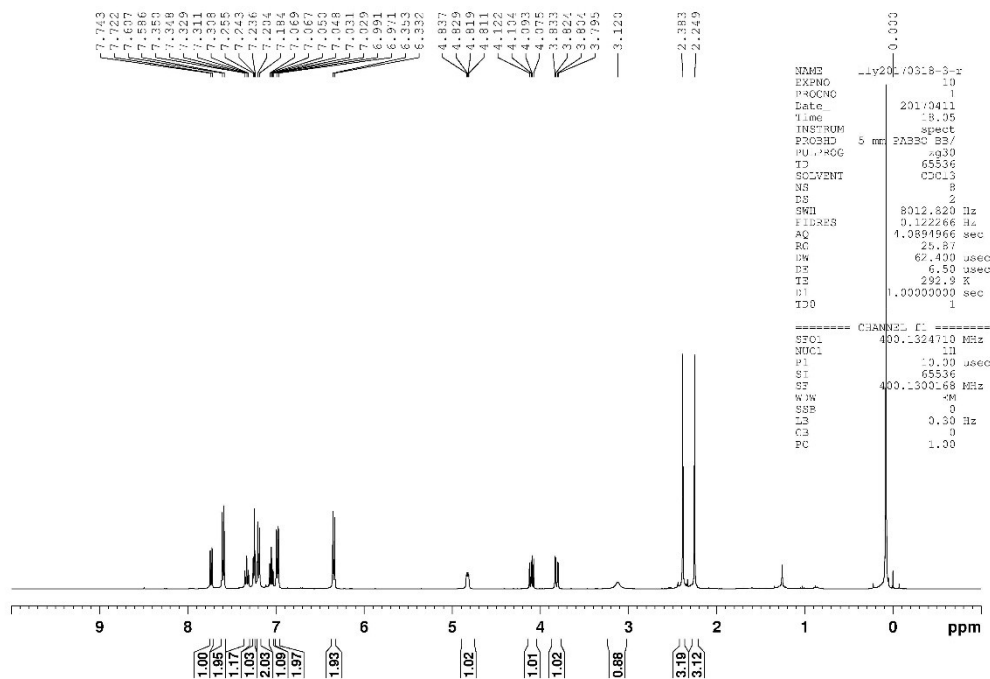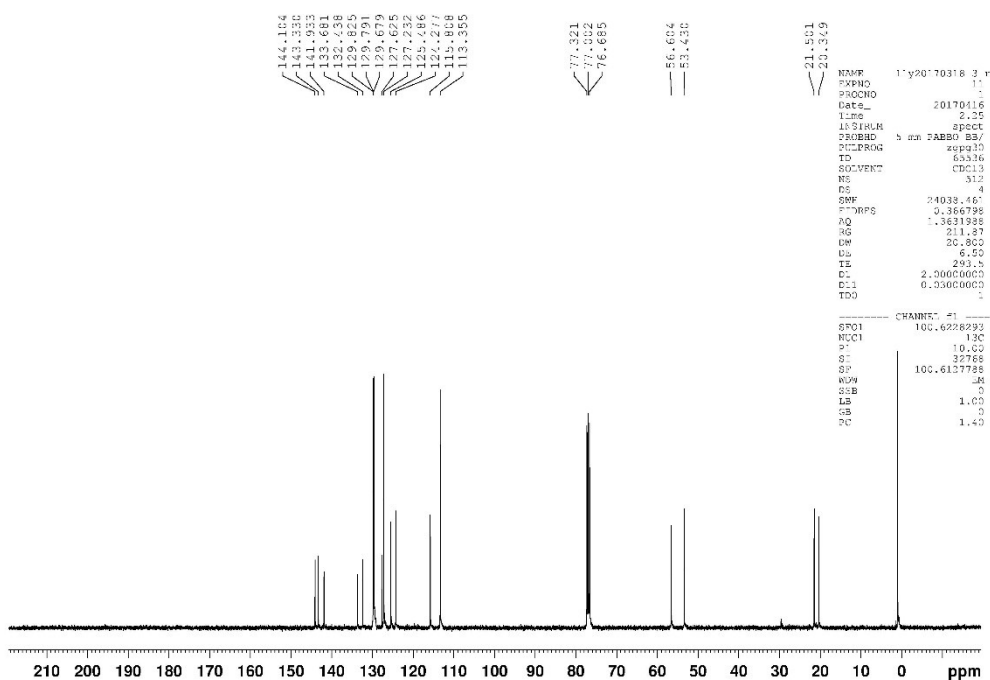

**N-(4-butylphenyl)-1-tosylindolin-3-amine (3r)**

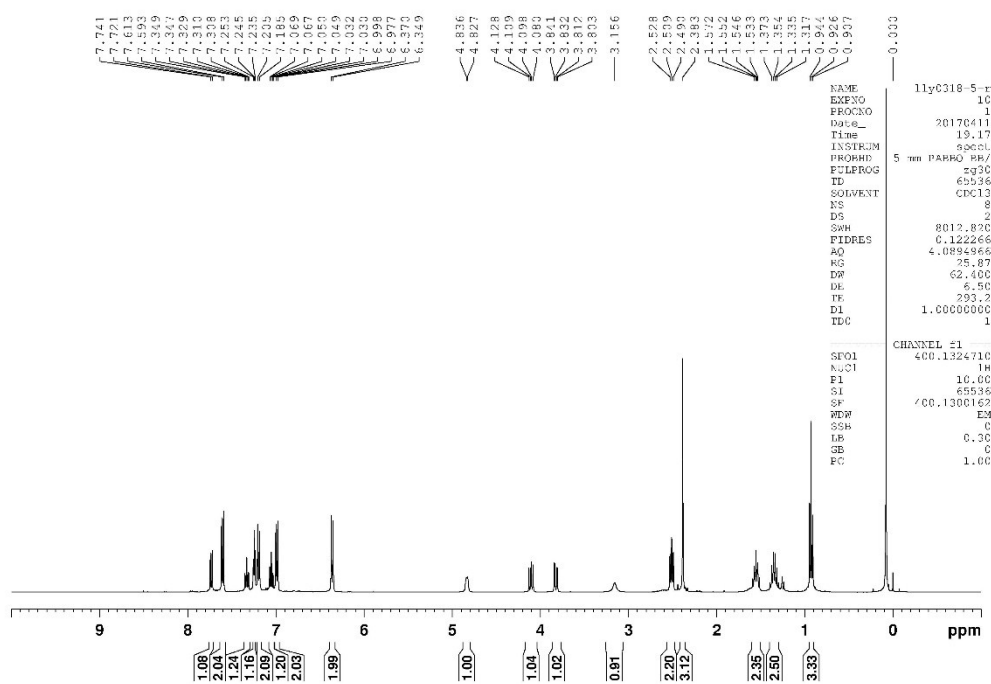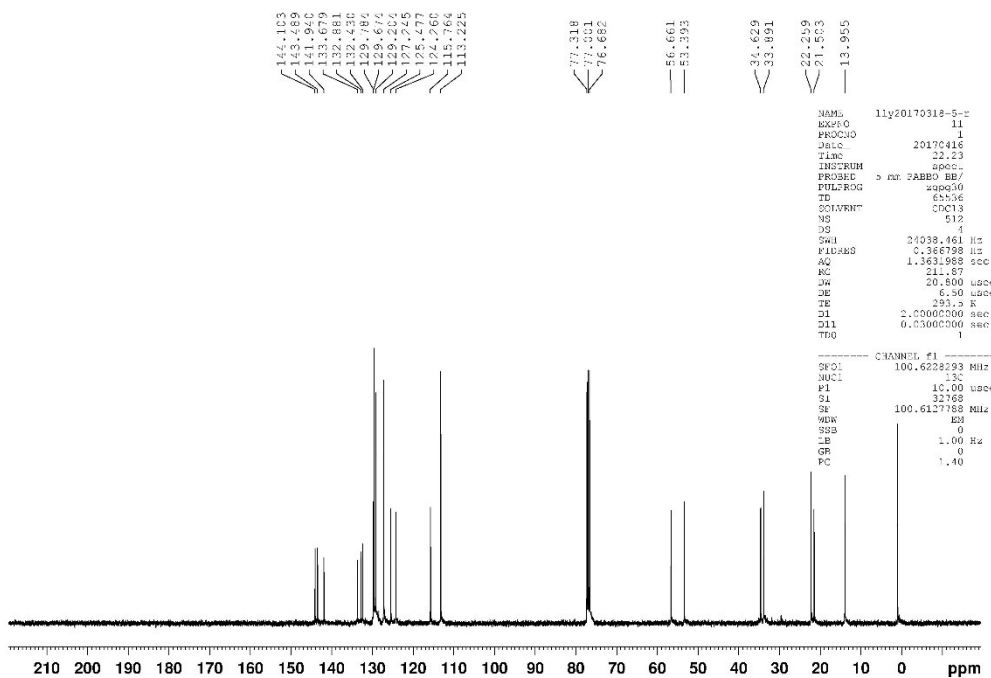

**N-(4-(tert-butyl)phenyl)-1-tosylindolin-3-amine (3s)**

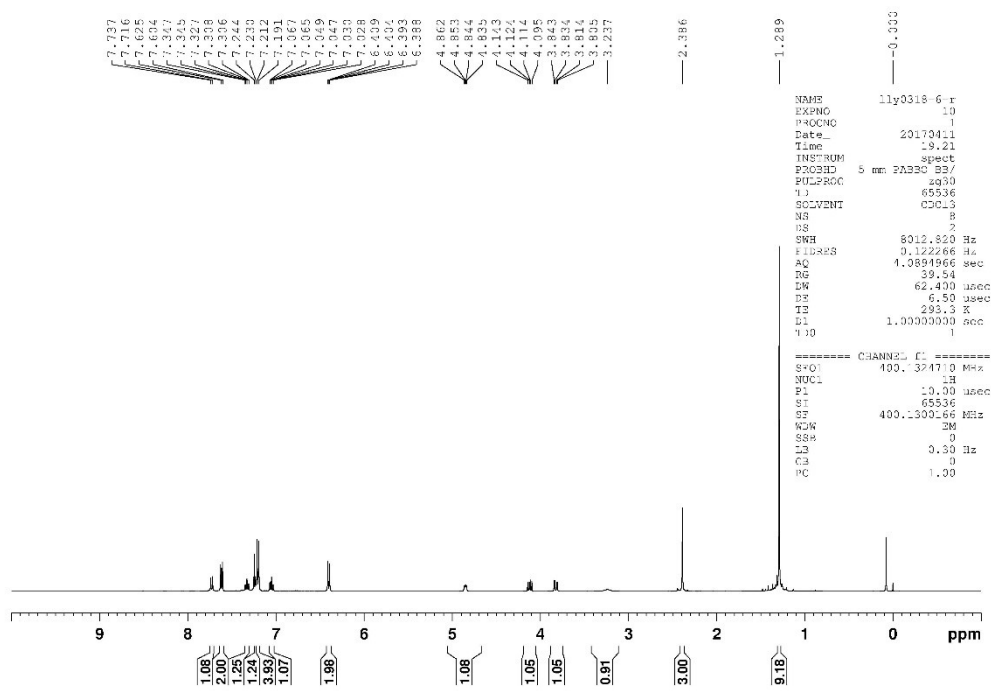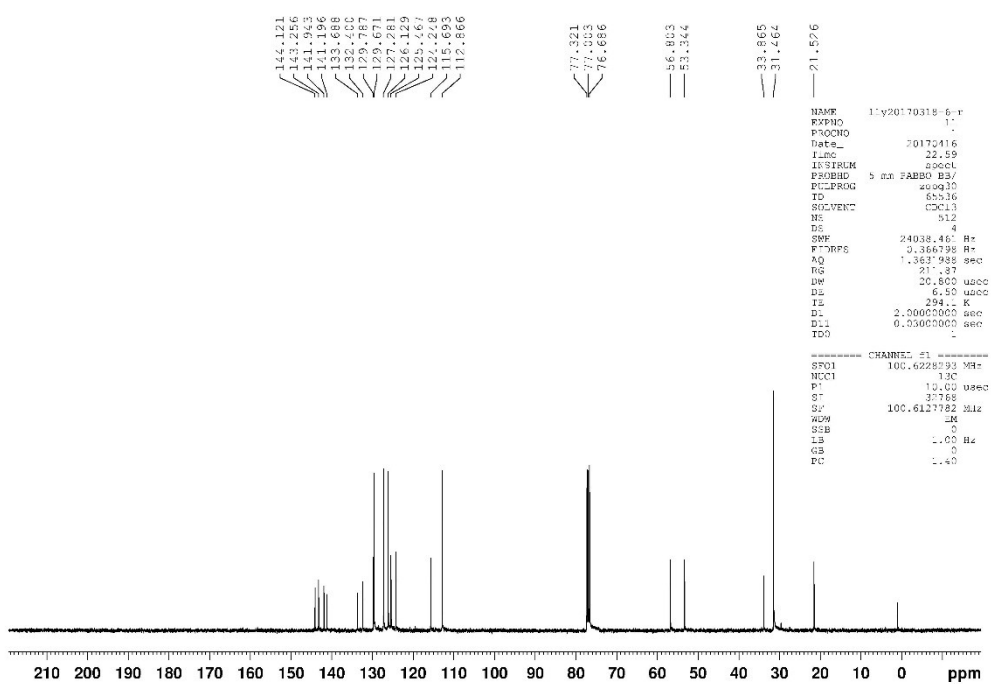



# N-(naphthalen-1-yl)-1-tosylindolin-3-amine (3t)

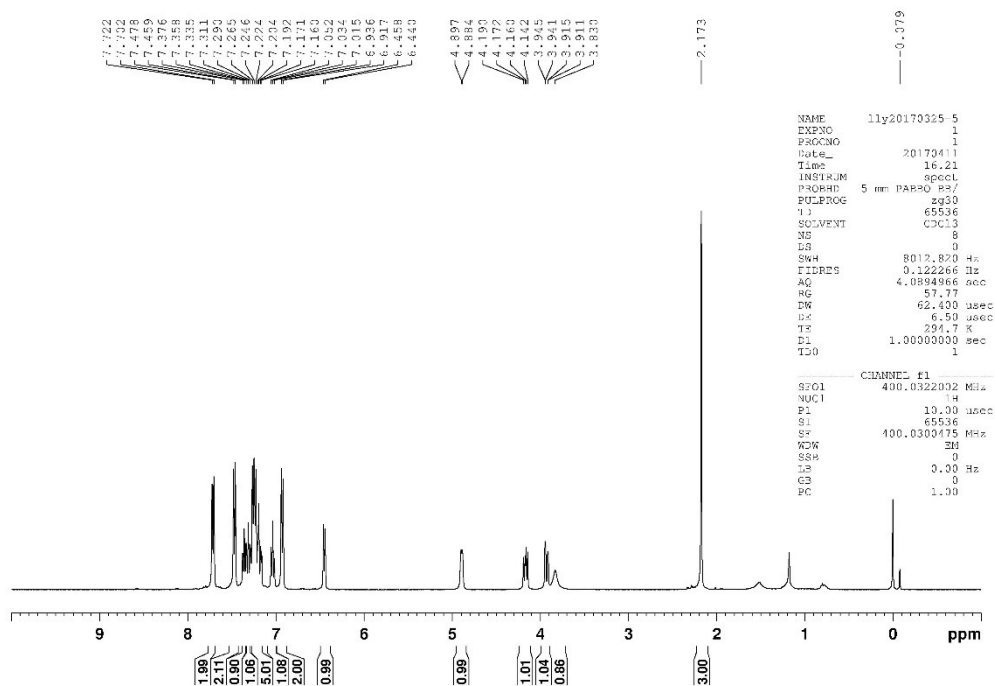

```

NAME      11y20170325 5
EXPNO    1
PROCNO   1
Date_    20170411
Time     16.21
INSTRUM  spect
PROBHD   5 mm PABBO B2/
PULPROG  zg30
SI       65536
SOLVENT  CDCl3
NS       8
DS       0
SWH      8012.820 Hz
FIDRES   0.122266 Hz
AQ       4.0884966 sec
RG       57.77
DM       62.400 usec
DE       6.50 usec
TE       294.7 K
D1       1.0000000 sec
TD       1
===== CHANNEL f1 =====
SFO1     400.0322002 MHz
NUC1     1H
P1       10.00 usec
SI       65536
SF       400.030075 MHz
WDW      EM
SSB      0
LB       3.00 Hz
GB       0
PC       1.00
  
```

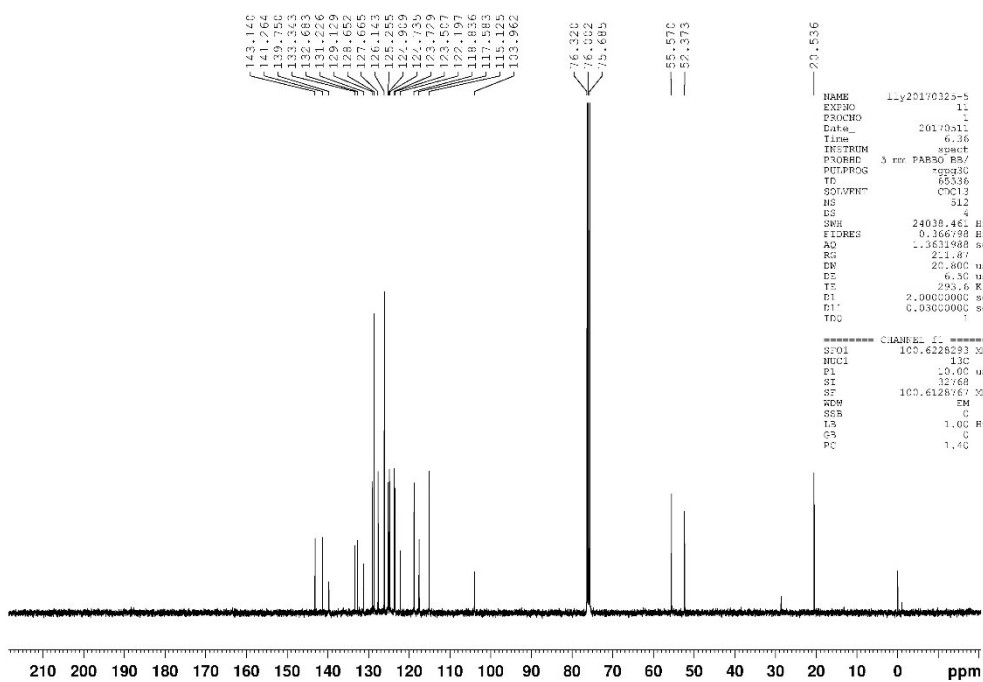

```

NAME      1-y20170325-5
EXPNO    1
PROCNO   1
Date_    20170311
Time     6.36
INSTRUM  spect
PROBHD   5 mm PABBO B2/
PULPROG  zgpg30
SI       65536
SOLVENT  CDCl3
NS       4
DS       4
SWH      24038.461 Hz
FIDRES   0.366798 Hz
AQ       1.3631988 sec
RG       21.87
DM       20.800 usec
DE       6.30 usec
TE       293.6 K
D1       2.0000000 sec
D11      0.0300000 sec
TD       1
===== CHANNEL f1 =====
SFO1     100.6228293 MHz
NUC1     13C
P1       10.00 usec
SI       32768
SF       100.6126767 MHz
WDW      EM
SSB      0
LB       1.00 Hz
GB       0
PC       1.40
  
```

# N-benzyl-1-tosylindolin-3-amine (3u)

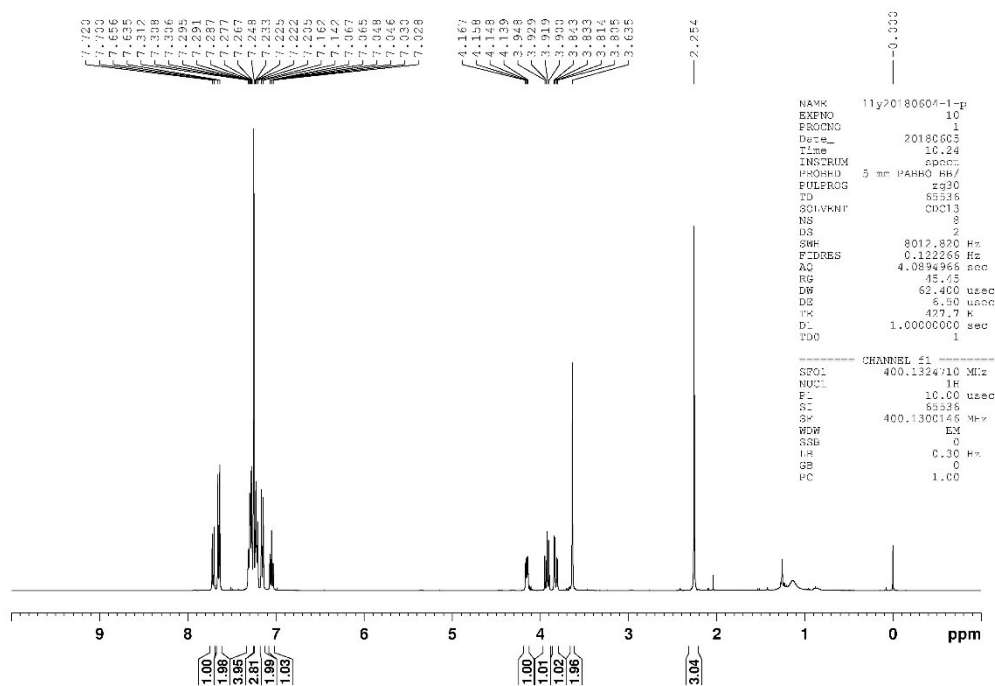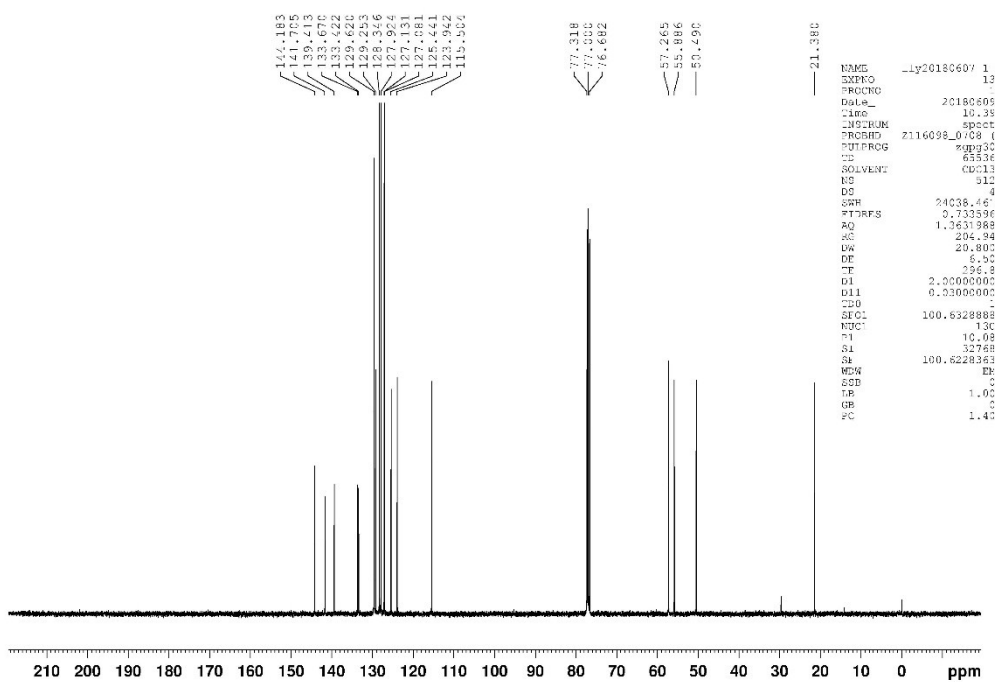

**N-phenethyl-1-tosylindolin-3-amine (3v)**

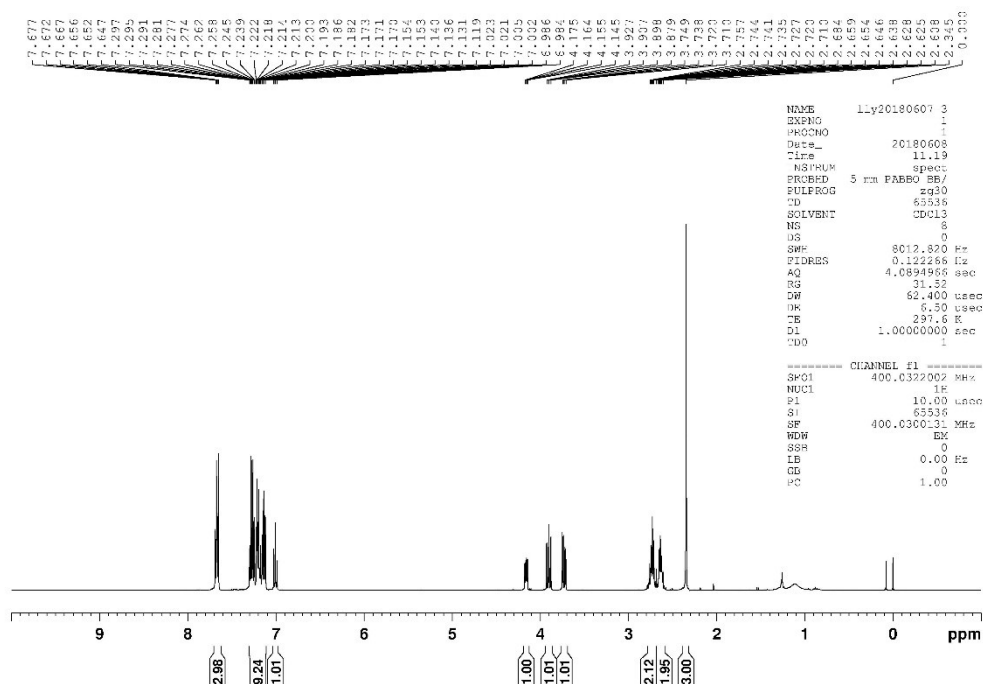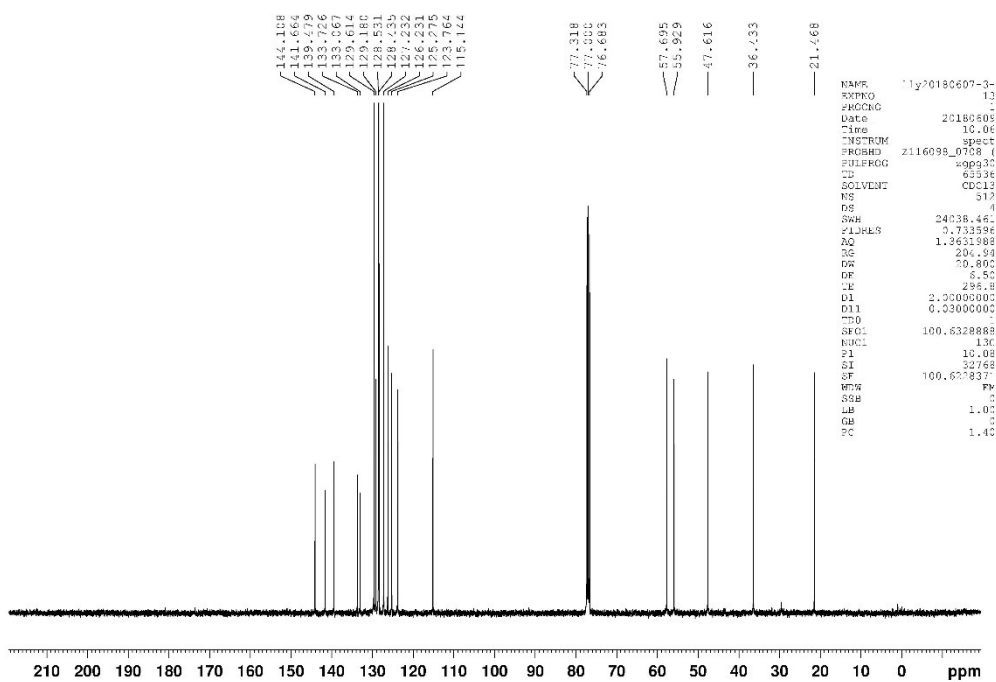

Supplement: c8gc01332b1.pdf [file c8gc01332b1.pdf]
